# Supplementary material for: The effect of heavy metals on the viability of Tetraselmis marina AC16-MESO and an evaluation of the potential use of this microalga in bioremediation
Source: PeerJ. 2018 Jul 25;6:e5295. doi: 10.7717/peerj.5295 (PMC6064205; doi:10.7717/peerj.5295)
Supplement: Figure S1 — Tetraselmis marina AC16-MESO (■) and the reference microalgaes Muriellopsis sp. (▴) and Nannochloropsis gaditana (•). [file peerj-06-5295-s001.xlsx]

## Sheet: ES c16 1
6	4001	0	0	550	1512673003	17580	60	0	0.000	2000
Aparato:	Serial número:	Software:	Usuario:
Pharo 300	13041067	2.17-Merck-2.20
Hora de inicio	Longitud de onda [nm]
2017-12-07 10:56:00	550
Hora [s]	Minutos	Hora	Absorbancia 550	ES
0	0	0	0.977	0
60	1	0.0166667	0.975	0
120	2	0.0333333	0.966	0.01
180	3	0.05	0.953	0.02
240	4	0.0666667	0.945	0.03
300	5	0.0833333	0.93	0.05
360	6	0.1	0.92	0
420	7	0.116667	0.901	0.02
480	8	0.133333	0.882	0.04
540	9	0.15	0.858	0.07
600	10	0.166667	0.846	0.08
660	11	0.183333	0.798	0.13
720	12	0.2	0.799	0.13
780	13	0.216667	0.77	0.16
840	14	0.233333	0.751	0.18
900	15	0.25	0.723	0.21
960	16	0.266667	0.63	0.32
1020	17	0.283333	0.494	0.46
1080	18	0.3	0.367	0.6
1140	19	0.316667	0.338	0.63
1200	20	0.333333	0.304	0.67
1260	21	0.35	0.374	0.59
1320	22	0.366667	0.427	0.54
1380	23	0.383333	0.373	0.59
1440	24	0.4	0.315	0.66
1500	25	0.416667	0.365	0.6
1560	26	0.433333	0.376	0.59
1620	27	0.45	0.338	0.63
1680	28	0.466667	0.304	0.67
1740	29	0.483333	0.333	0.64
1800	30	0.5	0.31	0.66
1860	31	0.516667	0.273	0.7
1920	32	0.533333	0.283	0.69
1980	33	0.55	0.286	0.69
2040	34	0.566667	0.292	0.68
2100	35	0.583333	0.267	0.71
2160	36	0.6	0.279	0.7
2220	37	0.616667	0.259	0.72
2280	38	0.633333	0.25	0.73
2340	39	0.65	0.243	0.74
2400	40	0.666667	0.243	0.74
2460	41	0.683333	0.23	0.75
2520	42	0.7	0.23	0.75
2580	43	0.716667	0.23	0.75
2640	44	0.733333	0.219	0.76
2700	45	0.75	0.219	0.76
2760	46	0.766667	0.219	0.76
2820	47	0.783333	0.219	0.76
2880	48	0.8	0.219	0.76
2940	49	0.816667	0.206	0.78
3000	50	0.833333	0.206	0.78
3060	51	0.85	0.202	0.78
3120	52	0.866667	0.198	0.78
3180	53	0.883333	0.193	0.79
3240	54	0.9	0.193	0.79
3300	55	0.916667	0.184	0.8
3360	56	0.933333	0.184	0.8
3420	57	0.95	0.184	0.8
3480	58	0.966667	0.177	0.81
3540	59	0.983333	0.177	0.81
3600	60	1	0.177	0.81
3660	61	1.01667	0.175	0.81
3720	62	1.03333	0.17	0.82
3780	63	1.05	0.17	0.82
3840	64	1.06667	0.168	0.82
3900	65	1.08333	0.168	0.82
3960	66	1.1	0.168	0.82
4020	67	1.11667	0.164	0.82
4080	68	1.13333	0.164	0.82
4140	69	1.15	0.164	0.82
4200	70	1.16667	0.158	0.83
4260	71	1.18333	0.16	0.83
4320	72	1.2	0.16	0.83
4380	73	1.21667	0.16	0.83
4440	74	1.23333	0.155	0.83
4500	75	1.25	0.147	0.84
4560	76	1.26667	0.147	0.84
4620	77	1.28333	0.147	0.84
4680	78	1.3	0.147	0.84
4740	79	1.31667	0.147	0.84
4800	80	1.33333	0.146	0.84
4860	81	1.35	0.146	0.84
4920	82	1.36667	0.138	0.85
4980	83	1.38333	0.138	0.85
5040	84	1.4	0.138	0.85
5100	85	1.41667	0.131	0.86
5160	86	1.43333	0.131	0.86
5220	87	1.45	0.128	0.86
5280	88	1.46667	0.128	0.86
5340	89	1.48333	0.128	0.86
5400	90	1.5	0.128	0.86
5460	91	1.51667	0.126	0.86
5520	92	1.53333	0.126	0.86
5580	93	1.55	0.126	0.86
5640	94	1.56667	0.125	0.86
5700	95	1.58333	0.125	0.86
5760	96	1.6	0.124	0.87
5820	97	1.61667	0.121	0.87
5880	98	1.63333	0.121	0.87
5940	99	1.65	0.121	0.87
6000	100	1.66667	0.118	0.87
6060	101	1.68333	0.118	0.87
6120	102	1.7	0.118	0.87
6180	103	1.71667	0.118	0.87
6240	104	1.73333	0.117	0.87
6300	105	1.75	0.115	0.88
6360	106	1.76667	0.115	0.88
6420	107	1.78333	0.115	0.88
6480	108	1.8	0.112	0.88
6540	109	1.81667	0.112	0.88
6600	110	1.83333	0.113	0.88
6660	111	1.85	0.112	0.88
6720	112	1.86667	0.108	0.88
6780	113	1.88333	0.106	0.88
6840	114	1.9	0.105	0.89
6900	115	1.91667	0.105	0.89
6960	116	1.93333	0.105	0.89
7020	117	1.95	0.105	0.89
7080	118	1.96667	0.104	0.89
7140	119	1.98333	0.105	0.89
7200	120	2	0.104	0.89
7260	121	2.01667	0.103	0.89
7320	122	2.03333	0.103	0.89
7380	123	2.05	0.103	0.89
7440	124	2.06667	0.103	0.89
7500	125	2.08333	0.097	0.89
7560	126	2.1	0.097	0.89
7620	127	2.11667	0.098	0.89
7680	128	2.13333	0.098	0.89
7740	129	2.15	0.098	0.89
7800	130	2.16667	0.099	0.89
7860	131	2.18333	0.097	0.89
7920	132	2.2	0.099	0.89
7980	133	2.21667	0.099	0.89
8040	134	2.23333	0.095	0.9
8100	135	2.25	0.095	0.9
8160	136	2.26667	0.095	0.9
8220	137	2.28333	0.095	0.9
8280	138	2.3	0.095	0.9
8340	139	2.31667	0.091	0.9
8400	140	2.33333	0.091	0.9
8460	141	2.35	0.091	0.9
8520	142	2.36667	0.091	0.9
8580	143	2.38333	0.091	0.9
8640	144	2.4	0.092	0.9
8700	145	2.41667	0.092	0.9
8760	146	2.43333	0.092	0.9
8820	147	2.45	0.092	0.9
8880	148	2.46667	0.092	0.9
8940	149	2.48333	0.087	0.91
9000	150	2.5	0.086	0.91
9060	151	2.51667	0.086	0.91
9120	152	2.53333	0.088	0.9
9180	153	2.55	0.087	0.91
9240	154	2.56667	0.087	0.91
9300	155	2.58333	0.085	0.91
9360	156	2.6	0.085	0.91
9420	157	2.61667	0.085	0.91
9480	158	2.63333	0.085	0.91
9540	159	2.65	0.085	0.91
9600	160	2.66667	0.085	0.91
9660	161	2.68333	0.085	0.91
9720	162	2.7	0.083	0.91
9780	163	2.71667	0.083	0.91
9840	164	2.73333	0.083	0.91
9900	165	2.75	0.081	0.91
9960	166	2.76667	0.083	0.91
10020	167	2.78333	0.081	0.91
10080	168	2.8	0.081	0.91
10140	169	2.81667	0.081	0.91
10200	170	2.83333	0.081	0.91
10260	171	2.85	0.081	0.91
10320	172	2.86667	0.078	0.92
10380	173	2.88333	0.079	0.91
10440	174	2.9	0.079	0.91
10500	175	2.91667	0.078	0.92
10560	176	2.93333	0.079	0.91
10620	177	2.95	0.077	0.92
10680	178	2.96667	0.077	0.92
10740	179	2.98333	0.077	0.92
10800	180	3	0.077	0.92
10860	181	3.01667	0.077	0.92
10920	182	3.03333	0.077	0.92
10980	183	3.05	0.077	0.92
11040	184	3.06667	0.076	0.92
11100	185	3.08333	0.076	0.92
11160	186	3.1	0.076	0.92
11220	187	3.11667	0.074	0.92
11280	188	3.13333	0.074	0.92
11340	189	3.15	0.075	0.92
11400	190	3.16667	0.075	0.92
11460	191	3.18333	0.075	0.92
11520	192	3.2	0.075	0.92
11580	193	3.21667	0.074	0.92
11640	194	3.23333	0.074	0.92
11700	195	3.25	0.072	0.92
11760	196	3.26667	0.072	0.92
11820	197	3.28333	0.073	0.92
11880	198	3.3	0.073	0.92
11940	199	3.31667	0.072	0.92
12000	200	3.33333	0.072	0.92
12060	201	3.35	0.071	0.92
12120	202	3.36667	0.071	0.92
12180	203	3.38333	0.071	0.92
12240	204	3.4	0.071	0.92
12300	205	3.41667	0.069	0.93
12360	206	3.43333	0.069	0.93
12420	207	3.45	0.07	0.92
12480	208	3.46667	0.07	0.92
12540	209	3.48333	0.07	0.92
12600	210	3.5	0.07	0.92
12660	211	3.51667	0.069	0.93
12720	212	3.53333	0.069	0.93
12780	213	3.55	0.069	0.93
12840	214	3.56667	0.068	0.93
12900	215	3.58333	0.068	0.93
12960	216	3.6	0.068	0.93
13020	217	3.61667	0.068	0.93
13080	218	3.63333	0.068	0.93
13140	219	3.65	0.068	0.93
13200	220	3.66667	0.065	0.93
13260	221	3.68333	0.067	0.93
13320	222	3.7	0.066	0.93
13380	223	3.71667	0.065	0.93
13440	224	3.73333	0.065	0.93
13500	225	3.75	0.065	0.93
13560	226	3.76667	0.065	0.93
13620	227	3.78333	0.065	0.93
13680	228	3.8	0.065	0.93
13740	229	3.81667	0.065	0.93
13800	230	3.83333	0.064	0.93
13860	231	3.85	0.065	0.93
13920	232	3.86667	0.063	0.93
13980	233	3.88333	0.063	0.93
14040	234	3.9	0.062	0.93
14100	235	3.91667	0.063	0.93
14160	236	3.93333	0.063	0.93
14220	237	3.95	0.063	0.93
14280	238	3.96667	0.062	0.93
14340	239	3.98333	0.063	0.93
14400	240	4	0.062	0.93
14460	241	4.01667	0.063	0.93
14520	242	4.03333	0.062	0.93
14580	243	4.05	0.062	0.93
14640	244	4.06667	0.062	0.93
14700	245	4.08333	0.062	0.93
14760	246	4.1	0.061	0.93
14820	247	4.11667	0.061	0.93
14880	248	4.13333	0.061	0.93
14940	249	4.15	0.061	0.93
15000	250	4.16667	0.061	0.93
15060	251	4.18333	0.061	0.93
15120	252	4.2	0.061	0.93
15180	253	4.21667	0.06	0.93
15240	254	4.23333	0.061	0.93
15300	255	4.25	0.061	0.93
15360	256	4.26667	0.061	0.93
15420	257	4.28333	0.061	0.93
15480	258	4.3	0.059	0.94
15540	259	4.31667	0.061	0.93
15600	260	4.33333	0.059	0.94
15660	261	4.35	0.059	0.94
15720	262	4.36667	0.059	0.94
15780	263	4.38333	0.059	0.94
15840	264	4.4	0.059	0.94
15900	265	4.41667	0.059	0.94
15960	266	4.43333	0.059	0.94
16020	267	4.45	0.059	0.94
16080	268	4.46667	0.058	0.94
16140	269	4.48333	0.058	0.94
16200	270	4.5	0.058	0.94
16260	271	4.51667	0.058	0.94
16320	272	4.53333	0.058	0.94
16380	273	4.55	0.058	0.94
16440	274	4.56667	0.058	0.94
16500	275	4.58333	0.058	0.94
16560	276	4.6	0.058	0.94
16620	277	4.61667	0.058	0.94
16680	278	4.63333	0.057	0.94
16740	279	4.65	0.057	0.94
16800	280	4.66667	0.057	0.94
16860	281	4.68333	0.056	0.94
16920	282	4.7	0.056	0.94
16980	283	4.71667	0.056	0.94
17040	284	4.73333	0.056	0.94
17100	285	4.75	0.056	0.94
17160	286	4.76667	0	0.94
17220	287	4.78333	0	0.94
17280	288	4.8	0	0.94
17340	289	4.81667	0	0.94
17400	290	4.83333	0	0.94
17460	291	4.85	0	0.94
17520	292	4.86667	0	0.94
17580	293	4.88333	0	0.94

## Sheet: ES C16 2
6	4001	0	0	550	1513017792	17220	60	0	0.000	2000	0	1000	µkat	2
Aparato:	Serial número:	Software:	Usuario:
Pharo 300	13041067	2.17-Merck-2.20
Hora de inicio	Longitud de onda [nm]
2017-12-11 10:43:12	550
Hora [s]	Minutos	Horas	Absorbancia	ES
0	0	0	0.917	0
60	1	0.0166667	0.891	0.0283533
120	2	0.0333333	0.859	0.0632497
180	3	0.05	0.826	0.0992366
240	4	0.0666667	0.793	0.135224
300	5	0.0833333	0.753	0.178844
360	6	0.1	0.71	0.225736
420	7	0.116667	0.574	0.374046
480	8	0.133333	0.489	0.466739
540	9	0.15	0.477	0.479826
600	10	0.166667	0.417	0.545256
660	11	0.183333	0.372	0.594329
720	12	0.2	0.433	0.527808
780	13	0.216667	0.394	0.570338
840	14	0.233333	0.364	0.603053
900	15	0.25	0.359	0.608506
960	16	0.266667	0.352	0.61614
1020	17	0.283333	0.321	0.649945
1080	18	0.3	0.311	0.660851
1140	19	0.316667	0.292	0.68157
1200	20	0.333333	0.289	0.684842
1260	21	0.35	0.279	0.695747
1320	22	0.366667	0.271	0.704471
1380	23	0.383333	0.265	0.711014
1440	24	0.4	0.25	0.727372
1500	25	0.416667	0.244	0.733915
1560	26	0.433333	0.239	0.739368
1620	27	0.45	0.231	0.748092
1680	28	0.466667	0.218	0.762268
1740	29	0.483333	0.22	0.760087
1800	30	0.5	0.215	0.76554
1860	31	0.516667	0.198	0.784079
1920	32	0.533333	0.193	0.789531
1980	33	0.55	0.189	0.793893
2040	34	0.566667	0.185	0.798255
2100	35	0.583333	0.177	0.806979
2160	36	0.6	0.17	0.814613
2220	37	0.616667	0.171	0.813522
2280	38	0.633333	0.165	0.820065
2340	39	0.65	0.161	0.824427
2400	40	0.666667	0.158	0.827699
2460	41	0.683333	0.15	0.836423
2520	42	0.7	0.152	0.834242
2580	43	0.716667	0.149	0.837514
2640	44	0.733333	0.145	0.841876
2700	45	0.75	0.141	0.846238
2760	46	0.766667	0.139	0.848419
2820	47	0.783333	0.137	0.8506
2880	48	0.8	0.133	0.854962
2940	49	0.816667	0.13	0.858233
3000	50	0.833333	0.132	0.856052
3060	51	0.85	0.124	0.864776
3120	52	0.866667	0.123	0.865867
3180	53	0.883333	0.124	0.864776
3240	54	0.9	0.121	0.868048
3300	55	0.916667	0.121	0.868048
3360	56	0.933333	0.119	0.870229
3420	57	0.95	0.116	0.873501
3480	58	0.966667	0.114	0.875682
3540	59	0.983333	0.114	0.875682
3600	60	1	0.112	0.877863
3660	61	1.01667	0.108	0.882225
3720	62	1.03333	0.105	0.885496
3780	63	1.05	0.106	0.884406
3840	64	1.06667	0.106	0.884406
3900	65	1.08333	0.104	0.886587
3960	66	1.1	0.102	0.888768
4020	67	1.11667	0.101	0.889858
4080	68	1.13333	0.099	0.892039
4140	69	1.15	0.099	0.892039
4200	70	1.16667	0.099	0.892039
4260	71	1.18333	0.097	0.89422
4320	72	1.2	0.093	0.898582
4380	73	1.21667	0.092	0.899673
4440	74	1.23333	0.09	0.901854
4500	75	1.25	0.091	0.900763
4560	76	1.26667	0.09	0.901854
4620	77	1.28333	0.089	0.902944
4680	78	1.3	0.089	0.902944
4740	79	1.31667	0.089	0.902944
4800	80	1.33333	0.086	0.906216
4860	81	1.35	0.085	0.907306
4920	82	1.36667	0.084	0.908397
4980	83	1.38333	0.084	0.908397
5040	84	1.4	0.083	0.909487
5100	85	1.41667	0.081	0.911668
5160	86	1.43333	0.081	0.911668
5220	87	1.45	0.081	0.911668
5280	88	1.46667	0.08	0.912759
5340	89	1.48333	0.079	0.91385
5400	90	1.5	0.078	0.91494
5460	91	1.51667	0.077	0.916031
5520	92	1.53333	0.076	0.917121
5580	93	1.55	0.075	0.918212
5640	94	1.56667	0.076	0.917121
5700	95	1.58333	0.074	0.919302
5760	96	1.6	0.075	0.918212
5820	97	1.61667	0.075	0.918212
5880	98	1.63333	0.072	0.921483
5940	99	1.65	0.073	0.920393
6000	100	1.66667	0.073	0.920393
6060	101	1.68333	0.07	0.923664
6120	102	1.7	0.07	0.923664
6180	103	1.71667	0.07	0.923664
6240	104	1.73333	0.07	0.923664
6300	105	1.75	0.067	0.926936
6360	106	1.76667	0.068	0.925845
6420	107	1.78333	0.067	0.926936
6480	108	1.8	0.068	0.925845
6540	109	1.81667	0.067	0.926936
6600	110	1.83333	0.066	0.928026
6660	111	1.85	0.066	0.928026
6720	112	1.86667	0.067	0.926936
6780	113	1.88333	0.065	0.929117
6840	114	1.9	0.066	0.928026
6900	115	1.91667	0.064	0.930207
6960	116	1.93333	0.065	0.929117
7020	117	1.95	0.063	0.931298
7080	118	1.96667	0.064	0.930207
7140	119	1.98333	0.063	0.931298
7200	120	2	0.062	0.932388
7260	121	2.01667	0.062	0.932388
7320	122	2.03333	0.06	0.934569
7380	123	2.05	0.058	0.93675
7440	124	2.06667	0.062	0.932388
7500	125	2.08333	0.06	0.934569
7560	126	2.1	0.06	0.934569
7620	127	2.11667	0.06	0.934569
7680	128	2.13333	0.061	0.933479
7740	129	2.15	0.059	0.93566
7800	130	2.16667	0.058	0.93675
7860	131	2.18333	0.059	0.93566
7920	132	2.2	0.059	0.93566
7980	133	2.21667	0.058	0.93675
8040	134	2.23333	0.058	0.93675
8100	135	2.25	0.057	0.937841
8160	136	2.26667	0.058	0.93675
8220	137	2.28333	0.057	0.937841
8280	138	2.3	0.056	0.938931
8340	139	2.31667	0.056	0.938931
8400	140	2.33333	0.057	0.937841
8460	141	2.35	0.057	0.937841
8520	142	2.36667	0.057	0.937841
8580	143	2.38333	0.056	0.938931
8640	144	2.4	0.056	0.938931
8700	145	2.41667	0.056	0.938931
8760	146	2.43333	0.056	0.938931
8820	147	2.45	0.055	0.940022
8880	148	2.46667	0.053	0.942203
8940	149	2.48333	0.054	0.941112
9000	150	2.5	0.052	0.943293
9060	151	2.51667	0.053	0.942203
9120	152	2.53333	0.052	0.943293
9180	153	2.55	0.052	0.943293
9240	154	2.56667	0.053	0.942203
9300	155	2.58333	0.053	0.942203
9360	156	2.6	0.053	0.942203
9420	157	2.61667	0.053	0.942203
9480	158	2.63333	0.052	0.943293
9540	159	2.65	0.051	0.944384
9600	160	2.66667	0.052	0.943293
9660	161	2.68333	0.053	0.942203
9720	162	2.7	0.051	0.944384
9780	163	2.71667	0.051	0.944384
9840	164	2.73333	0.051	0.944384
9900	165	2.75	0.051	0.944384
9960	166	2.76667	0.051	0.944384
10020	167	2.78333	0.05	0.945474
10080	168	2.8	0.05	0.945474
10140	169	2.81667	0.051	0.944384
10200	170	2.83333	0.051	0.944384
10260	171	2.85	0.049	0.946565
10320	172	2.86667	0.051	0.944384
10380	173	2.88333	0.05	0.945474
10440	174	2.9	0.049	0.946565
10500	175	2.91667	0.049	0.946565
10560	176	2.93333	0.049	0.946565
10620	177	2.95	0.049	0.946565
10680	178	2.96667	0.048	0.947655
10740	179	2.98333	0.048	0.947655
10800	180	3	0.048	0.947655
10860	181	3.01667	0.048	0.947655
10920	182	3.03333	0.049	0.946565
10980	183	3.05	0.048	0.947655
11040	184	3.06667	0.048	0.947655
11100	185	3.08333	0.048	0.947655
11160	186	3.1	0.047	0.948746
11220	187	3.11667	0.048	0.947655
11280	188	3.13333	0.047	0.948746
11340	189	3.15	0.047	0.948746
11400	190	3.16667	0.047	0.948746
11460	191	3.18333	0.046	0.949836
11520	192	3.2	0.047	0.948746
11580	193	3.21667	0.046	0.949836
11640	194	3.23333	0.047	0.948746
11700	195	3.25	0.047	0.948746
11760	196	3.26667	0.047	0.948746
11820	197	3.28333	0.046	0.949836
11880	198	3.3	0.046	0.949836
11940	199	3.31667	0.045	0.950927
12000	200	3.33333	0.045	0.950927
12060	201	3.35	0.046	0.949836
12120	202	3.36667	0.046	0.949836
12180	203	3.38333	0.046	0.949836
12240	204	3.4	0.045	0.950927
12300	205	3.41667	0.047	0.948746
12360	206	3.43333	0.046	0.949836
12420	207	3.45	0.045	0.950927
12480	208	3.46667	0.045	0.950927
12540	209	3.48333	0.045	0.950927
12600	210	3.5	0.046	0.949836
12660	211	3.51667	0.045	0.950927
12720	212	3.53333	0.046	0.949836
12780	213	3.55	0.045	0.950927
12840	214	3.56667	0.045	0.950927
12900	215	3.58333	0.045	0.950927
12960	216	3.6	0.045	0.950927
13020	217	3.61667	0.044	0.952017
13080	218	3.63333	0.044	0.952017
13140	219	3.65	0.044	0.952017
13200	220	3.66667	0.045	0.950927
13260	221	3.68333	0.044	0.952017
13320	222	3.7	0.044	0.952017
13380	223	3.71667	0.044	0.952017
13440	224	3.73333	0.044	0.952017
13500	225	3.75	0.044	0.952017
13560	226	3.76667	0.044	0.952017
13620	227	3.78333	0.044	0.952017
13680	228	3.8	0.043	0.953108
13740	229	3.81667	0.044	0.952017
13800	230	3.83333	0.044	0.952017
13860	231	3.85	0.044	0.952017
13920	232	3.86667	0.044	0.952017
13980	233	3.88333	0.044	0.952017
14040	234	3.9	0.043	0.953108
14100	235	3.91667	0.044	0.952017
14160	236	3.93333	0.043	0.953108
14220	237	3.95	0.044	0.952017
14280	238	3.96667	0.043	0.953108
14340	239	3.98333	0.043	0.953108
14400	240	4	0.043	0.953108
14460	241	4.01667	0.043	0.953108
14520	242	4.03333	0.043	0.953108
14580	243	4.05	0.044	0.952017
14640	244	4.06667	0.043	0.953108
14700	245	4.08333	0.043	0.953108
14760	246	4.1	0.043	0.953108
14820	247	4.11667	0.043	0.953108
14880	248	4.13333	0.042	0.954198
14940	249	4.15	0.043	0.953108
15000	250	4.16667	0.043	0.953108
15060	251	4.18333	0.042	0.954198
15120	252	4.2	0.042	0.954198
15180	253	4.21667	0.042	0.954198
15240	254	4.23333	0.042	0.954198
15300	255	4.25	0.042	0.954198
15360	256	4.26667	0.042	0.954198
15420	257	4.28333	0.042	0.954198
15480	258	4.3	0.042	0.954198
15540	259	4.31667	0.042	0.954198
15600	260	4.33333	0.042	0.954198
15660	261	4.35	0.041	0.955289
15720	262	4.36667	0.041	0.955289
15780	263	4.38333	0.041	0.955289
15840	264	4.4	0.042	0.954198
15900	265	4.41667	0.042	0.954198
15960	266	4.43333	0.042	0.954198
16020	267	4.45	0.042	0.954198
16080	268	4.46667	0.041	0.955289
16140	269	4.48333	0.041	0.955289
16200	270	4.5	0.041	0.955289
16260	271	4.51667	0.042	0.954198
16320	272	4.53333	0.041	0.955289
16380	273	4.55	0.041	0.955289
16440	274	4.56667	0.041	0.955289
16500	275	4.58333	0.041	0.955289
16560	276	4.6	0.042	0.954198
16620	277	4.61667	0.042	0.954198
16680	278	4.63333	0.04	0.956379
16740	279	4.65	0.041	0.955289
16800	280	4.66667	0.042	0.954198
16860	281	4.68333	0.041	0.955289
16920	282	4.7	0.041	0.955289
16980	283	4.71667	0.041	0.955289
17040	284	4.73333	0.041	0.955289
17100	285	4.75	0.041	0.955289
17160	286	4.76667	0.041	0.955289
17220	287	4.78333	0.041	0.955289

## Sheet: ES Murie SW 1
6	4001	0	0	550	1513104083	17340	60	0	0.000	2000	0	1000	µkat
Aparato:	Serial número:	Software:	Usuario:
Pharo 300	13041067	2.17-Merck-2.20
Hora de inicio	Longitud de onda [nm]
2017-12-12 10:41:23	550
Segundo	Minutos	Horas	Absorbancia	ES
0	0	0	1063	0
60	1	0.0166667	1033	0
120	2	0.0333333	1020	0
180	3	0.05	1015	0
240	4	0.0666667	1010	0
300	5	0.0833333	0.99	0
360	6	0.1	0.964	0.0262626
420	7	0.116667	0.95	0.040404
480	8	0.133333	0.931	0.059596
540	9	0.15	0.897	0.0939394
600	10	0.166667	0.8	0.191919
660	11	0.183333	0.671	0.322222
720	12	0.2	0.624	0.369697
780	13	0.216667	0.588	0.406061
840	14	0.233333	0.622	0.371717
900	15	0.25	0.593	0.40101
960	16	0.266667	0.56	0.434343
1020	17	0.283333	0.597	0.39697
1080	18	0.3	0.571	0.423232
1140	19	0.316667	0.581	0.413131
1200	20	0.333333	0.537	0.457576
1260	21	0.35	0.552	0.442424
1320	22	0.366667	0.524	0.470707
1380	23	0.383333	0.528	0.466667
1440	24	0.4	0.518	0.476768
1500	25	0.416667	0.514	0.480808
1560	26	0.433333	0.512	0.482828
1620	27	0.45	0.501	0.493939
1680	28	0.466667	0.498	0.49697
1740	29	0.483333	0.49	0.505051
1800	30	0.5	0.48	0.515152
1860	31	0.516667	0.477	0.518182
1920	32	0.533333	0.469	0.526263
1980	33	0.55	0.464	0.531313
2040	34	0.566667	0.467	0.528283
2100	35	0.583333	0.46	0.535354
2160	36	0.6	0.457	0.538384
2220	37	0.616667	0.452	0.543434
2280	38	0.633333	0.448	0.547475
2340	39	0.65	0.444	0.551515
2400	40	0.666667	0.443	0.552525
2460	41	0.683333	0.439	0.556566
2520	42	0.7	0.435	0.560606
2580	43	0.716667	0.431	0.564646
2640	44	0.733333	0.431	0.564646
2700	45	0.75	0.428	0.567677
2760	46	0.766667	0.425	0.570707
2820	47	0.783333	0.421	0.574747
2880	48	0.8	0.422	0.573737
2940	49	0.816667	0.419	0.576768
3000	50	0.833333	0.415	0.580808
3060	51	0.85	0.416	0.579798
3120	52	0.866667	0.413	0.582828
3180	53	0.883333	0.409	0.586869
3240	54	0.9	0.409	0.586869
3300	55	0.916667	0.405	0.590909
3360	56	0.933333	0.403	0.592929
3420	57	0.95	0.403	0.592929
3480	58	0.966667	0.401	0.594949
3540	59	0.983333	0.401	0.594949
3600	60	1	0.399	0.59697
3660	61	1.01667	0.395	0.60101
3720	62	1.03333	0.395	0.60101
3780	63	1.05	0.395	0.60101
3840	64	1.06667	0.391	0.605051
3900	65	1.08333	0.391	0.605051
3960	66	1.1	0.387	0.609091
4020	67	1.11667	0.386	0.610101
4080	68	1.13333	0.385	0.611111
4140	69	1.15	0.385	0.611111
4200	70	1.16667	0.385	0.611111
4260	71	1.18333	0.382	0.614141
4320	72	1.2	0.38	0.616162
4380	73	1.21667	0.38	0.616162
4440	74	1.23333	0.381	0.615152
4500	75	1.25	0.379	0.617172
4560	76	1.26667	0.377	0.619192
4620	77	1.28333	0.375	0.621212
4680	78	1.3	0.376	0.620202
4740	79	1.31667	0.376	0.620202
4800	80	1.33333	0.377	0.619192
4860	81	1.35	0.374	0.622222
4920	82	1.36667	0.373	0.623232
4980	83	1.38333	0.371	0.625253
5040	84	1.4	0.371	0.625253
5100	85	1.41667	0.37	0.626263
5160	86	1.43333	0.368	0.628283
5220	87	1.45	0.368	0.628283
5280	88	1.46667	0.368	0.628283
5340	89	1.48333	0.368	0.628283
5400	90	1.5	0.365	0.631313
5460	91	1.51667	0.366	0.630303
5520	92	1.53333	0.362	0.634343
5580	93	1.55	0.363	0.633333
5640	94	1.56667	0.362	0.634343
5700	95	1.58333	0.362	0.634343
5760	96	1.6	0.362	0.634343
5820	97	1.61667	0.361	0.635354
5880	98	1.63333	0.36	0.636364
5940	99	1.65	0.359	0.637374
6000	100	1.66667	0.357	0.639394
6060	101	1.68333	0.355	0.641414
6120	102	1.7	0.354	0.642424
6180	103	1.71667	0.355	0.641414
6240	104	1.73333	0.353	0.643434
6300	105	1.75	0.35	0.646465
6360	106	1.76667	0.35	0.646465
6420	107	1.78333	0.35	0.646465
6480	108	1.8	0.349	0.647475
6540	109	1.81667	0.349	0.647475
6600	110	1.83333	0.349	0.647475
6660	111	1.85	0.347	0.649495
6720	112	1.86667	0.345	0.651515
6780	113	1.88333	0.345	0.651515
6840	114	1.9	0.346	0.650505
6900	115	1.91667	0.343	0.653535
6960	116	1.93333	0.344	0.652525
7020	117	1.95	0.343	0.653535
7080	118	1.96667	0.342	0.654545
7140	119	1.98333	0.343	0.653535
7200	120	2	0.342	0.654545
7260	121	2.01667	0.342	0.654545
7320	122	2.03333	0.341	0.655556
7380	123	2.05	0.342	0.654545
7440	124	2.06667	0.341	0.655556
7500	125	2.08333	0.338	0.658586
7560	126	2.1	0.339	0.657576
7620	127	2.11667	0.34	0.656566
7680	128	2.13333	0.34	0.656566
7740	129	2.15	0.338	0.658586
7800	130	2.16667	0.338	0.658586
7860	131	2.18333	0.338	0.658586
7920	132	2.2	0.336	0.660606
7980	133	2.21667	0.336	0.660606
8040	134	2.23333	0.337	0.659596
8100	135	2.25	0.335	0.661616
8160	136	2.26667	0.334	0.662626
8220	137	2.28333	0.334	0.662626
8280	138	2.3	0.334	0.662626
8340	139	2.31667	0.333	0.663636
8400	140	2.33333	0.332	0.664646
8460	141	2.35	0.331	0.665657
8520	142	2.36667	0.331	0.665657
8580	143	2.38333	0.33	0.666667
8640	144	2.4	0.329	0.667677
8700	145	2.41667	0.329	0.667677
8760	146	2.43333	0.33	0.666667
8820	147	2.45	0.329	0.667677
8880	148	2.46667	0.329	0.667677
8940	149	2.48333	0.329	0.667677
9000	150	2.5	0.328	0.668687
9060	151	2.51667	0.329	0.667677
9120	152	2.53333	0.328	0.668687
9180	153	2.55	0.327	0.669697
9240	154	2.56667	0.326	0.670707
9300	155	2.58333	0.326	0.670707
9360	156	2.6	0.327	0.669697
9420	157	2.61667	0.325	0.671717
9480	158	2.63333	0.325	0.671717
9540	159	2.65	0.325	0.671717
9600	160	2.66667	0.324	0.672727
9660	161	2.68333	0.323	0.673737
9720	162	2.7	0.323	0.673737
9780	163	2.71667	0.323	0.673737
9840	164	2.73333	0.322	0.674747
9900	165	2.75	0.324	0.672727
9960	166	2.76667	0.322	0.674747
10020	167	2.78333	0.322	0.674747
10080	168	2.8	0.322	0.674747
10140	169	2.81667	0.322	0.674747
10200	170	2.83333	0.322	0.674747
10260	171	2.85	0.321	0.675758
10320	172	2.86667	0.32	0.676768
10380	173	2.88333	0.319	0.677778
10440	174	2.9	0.321	0.675758
10500	175	2.91667	0.319	0.677778
10560	176	2.93333	0.319	0.677778
10620	177	2.95	0.318	0.678788
10680	178	2.96667	0.319	0.677778
10740	179	2.98333	0.318	0.678788
10800	180	3	0.317	0.679798
10860	181	3.01667	0.317	0.679798
10920	182	3.03333	0.317	0.679798
10980	183	3.05	0.316	0.680808
11040	184	3.06667	0.315	0.681818
11100	185	3.08333	0.315	0.681818
11160	186	3.1	0.314	0.682828
11220	187	3.11667	0.315	0.681818
11280	188	3.13333	0.316	0.680808
11340	189	3.15	0.315	0.681818
11400	190	3.16667	0.314	0.682828
11460	191	3.18333	0.313	0.683838
11520	192	3.2	0.315	0.681818
11580	193	3.21667	0.314	0.682828
11640	194	3.23333	0.312	0.684848
11700	195	3.25	0.312	0.684848
11760	196	3.26667	0.311	0.685859
11820	197	3.28333	0.311	0.685859
11880	198	3.3	0.311	0.685859
11940	199	3.31667	0.312	0.684848
12000	200	3.33333	0.31	0.686869
12060	201	3.35	0.31	0.686869
12120	202	3.36667	0.309	0.687879
12180	203	3.38333	0.31	0.686869
12240	204	3.4	0.311	0.685859
12300	205	3.41667	0.311	0.685859
12360	206	3.43333	0.31	0.686869
12420	207	3.45	0.309	0.687879
12480	208	3.46667	0.309	0.687879
12540	209	3.48333	0.308	0.688889
12600	210	3.5	0.309	0.687879
12660	211	3.51667	0.308	0.688889
12720	212	3.53333	0.308	0.688889
12780	213	3.55	0.308	0.688889
12840	214	3.56667	0.307	0.689899
12900	215	3.58333	0.306	0.690909
12960	216	3.6	0.306	0.690909
13020	217	3.61667	0.306	0.690909
13080	218	3.63333	0.306	0.690909
13140	219	3.65	0.306	0.690909
13200	220	3.66667	0.306	0.690909
13260	221	3.68333	0.305	0.691919
13320	222	3.7	0.304	0.692929
13380	223	3.71667	0.305	0.691919
13440	224	3.73333	0.304	0.692929
13500	225	3.75	0.304	0.692929
13560	226	3.76667	0.303	0.693939
13620	227	3.78333	0.303	0.693939
13680	228	3.8	0.302	0.694949
13740	229	3.81667	0.303	0.693939
13800	230	3.83333	0.302	0.694949
13860	231	3.85	0.302	0.694949
13920	232	3.86667	0.303	0.693939
13980	233	3.88333	0.302	0.694949
14040	234	3.9	0.302	0.694949
14100	235	3.91667	0.301	0.69596
14160	236	3.93333	0.301	0.69596
14220	237	3.95	0.3	0.69697
14280	238	3.96667	0.3	0.69697
14340	239	3.98333	0.3	0.69697
14400	240	4	0.298	0.69899
14460	241	4.01667	0.299	0.69798
14520	242	4.03333	0.299	0.69798
14580	243	4.05	0.299	0.69798
14640	244	4.06667	0.298	0.69899
14700	245	4.08333	0.297	0.7
14760	246	4.1	0.298	0.69899
14820	247	4.11667	0.298	0.69899
14880	248	4.13333	0.297	0.7
14940	249	4.15	0.296	0.70101
15000	250	4.16667	0.296	0.70101
15060	251	4.18333	0.297	0.7
15120	252	4.2	0.297	0.7
15180	253	4.21667	0.296	0.70101
15240	254	4.23333	0.296	0.70101
15300	255	4.25	0.295	0.70202
15360	256	4.26667	0.295	0.70202
15420	257	4.28333	0.295	0.70202
15480	258	4.3	0.294	0.70303
15540	259	4.31667	0.294	0.70303
15600	260	4.33333	0.293	0.70404
15660	261	4.35	0.293	0.70404
15720	262	4.36667	0.294	0.70303
15780	263	4.38333	0.293	0.70404
15840	264	4.4	0.293	0.70404
15900	265	4.41667	0.293	0.70404
15960	266	4.43333	0.292	0.705051
16020	267	4.45	0.293	0.70404
16080	268	4.46667	0.292	0.705051
16140	269	4.48333	0.291	0.706061
16200	270	4.5	0.291	0.706061
16260	271	4.51667	0.291	0.706061
16320	272	4.53333	0.291	0.706061
16380	273	4.55	0.29	0.707071
16440	274	4.56667	0.29	0.707071
16500	275	4.58333	0.291	0.706061
16560	276	4.6	0.29	0.707071
16620	277	4.61667	0.29	0.707071
16680	278	4.63333	0.289	0.708081
16740	279	4.65	0.29	0.707071
16800	280	4.66667	0.289	0.708081
16860	281	4.68333	0.288	0.709091
16920	282	4.7	0.287	0.710101
16980	283	4.71667	0.287	0.710101
17040	284	4.73333	0.287	0.710101
17100	285	4.75	0.286	0.711111
17160	286	4.76667	0.287	0.710101
17220	287	4.78333	0.286	0.711111
17280	288	4.8	0.286	0.711111
17340	289	4.81667	0.286	0.711111

## Sheet: ES Murie SW 2
6	4001	0	0	550	1513194463	14640	60	0	0.000	2000	0	1000	µkat
Aparato:	Serial número:	Software:	Usuario:
Pharo 300	13041067	2.17-Merck-2.20
Hora de inicio	Longitud de onda [nm]
2017-12-13 11:47:43	550
Hora [s]	Minutos	Hora	Absorbancia
0	0	0	1077	0
60	1	0.0166667	1065	0
120	2	0.0333333	1068	0
180	3	0.05	1058	0
240	4	0.0666667	1043	0
300	5	0.0833333	1036	0
360	6	0.1	1020	0
420	7	0.116667	1012	0
480	8	0.133333	0.982	0
540	9	0.15	0.958	0.0244399
600	10	0.166667	0.912	0.0712831
660	11	0.183333	0.772	0.213849
720	12	0.2	0.68	0.307536
780	13	0.216667	0.794	0.191446
840	14	0.233333	0.721	0.265784
900	15	0.25	0.715	0.271894
960	16	0.266667	0.719	0.267821
1020	17	0.283333	0.694	0.293279
1080	18	0.3	0.686	0.301426
1140	19	0.316667	0.695	0.292261
1200	20	0.333333	0.683	0.304481
1260	21	0.35	0.647	0.341141
1320	22	0.366667	0.646	0.342159
1380	23	0.383333	0.628	0.360489
1440	24	0.4	0.627	0.361507
1500	25	0.416667	0.606	0.382892
1560	26	0.433333	0.607	0.381874
1620	27	0.45	0.605	0.38391
1680	28	0.466667	0.597	0.392057
1740	29	0.483333	0.584	0.405295
1800	30	0.5	0.578	0.411405
1860	31	0.516667	0.578	0.411405
1920	32	0.533333	0.577	0.412424
1980	33	0.55	0.569	0.42057
2040	34	0.566667	0.566	0.423625
2100	35	0.583333	0.563	0.42668
2160	36	0.6	0.559	0.430754
2220	37	0.616667	0.553	0.436864
2280	38	0.633333	0.55	0.439919
2340	39	0.65	0.548	0.441955
2400	40	0.666667	0.546	0.443992
2460	41	0.683333	0.541	0.449084
2520	42	0.7	0.538	0.452138
2580	43	0.716667	0.534	0.456212
2640	44	0.733333	0.532	0.458248
2700	45	0.75	0.527	0.46334
2760	46	0.766667	0.526	0.464358
2820	47	0.783333	0.524	0.466395
2880	48	0.8	0.522	0.468432
2940	49	0.816667	0.518	0.472505
3000	50	0.833333	0.516	0.474542
3060	51	0.85	0.51	0.480652
3120	52	0.866667	0.509	0.48167
3180	53	0.883333	0.504	0.486762
3240	54	0.9	0.503	0.48778
3300	55	0.916667	0.503	0.48778
3360	56	0.933333	0.504	0.486762
3420	57	0.95	0.5	0.490835
3480	58	0.966667	0.501	0.489817
3540	59	0.983333	0.499	0.491853
3600	60	1	0.495	0.495927
3660	61	1.01667	0.493	0.497963
3720	62	1.03333	0.491	0.5
3780	63	1.05	0.49	0.501018
3840	64	1.06667	0.488	0.503055
3900	65	1.08333	0.489	0.502037
3960	66	1.1	0.486	0.505092
4020	67	1.11667	0.484	0.507128
4080	68	1.13333	0.484	0.507128
4140	69	1.15	0.483	0.508147
4200	70	1.16667	0.482	0.509165
4260	71	1.18333	0.482	0.509165
4320	72	1.2	0.478	0.513238
4380	73	1.21667	0.48	0.511202
4440	74	1.23333	0.478	0.513238
4500	75	1.25	0.478	0.513238
4560	76	1.26667	0.477	0.514257
4620	77	1.28333	0.474	0.517312
4680	78	1.3	0.475	0.516293
4740	79	1.31667	0.473	0.51833
4800	80	1.33333	0.474	0.517312
4860	81	1.35	0.473	0.51833
4920	82	1.36667	0.471	0.520367
4980	83	1.38333	0.47	0.521385
5040	84	1.4	0.466	0.525458
5100	85	1.41667	0.466	0.525458
5160	86	1.43333	0.467	0.52444
5220	87	1.45	0.465	0.526477
5280	88	1.46667	0.465	0.526477
5340	89	1.48333	0.463	0.528513
5400	90	1.5	0.462	0.529532
5460	91	1.51667	0.462	0.529532
5520	92	1.53333	0.461	0.53055
5580	93	1.55	0.46	0.531568
5640	94	1.56667	0.461	0.53055
5700	95	1.58333	0.458	0.533605
5760	96	1.6	0.458	0.533605
5820	97	1.61667	0.457	0.534623
5880	98	1.63333	0.457	0.534623
5940	99	1.65	0.455	0.53666
6000	100	1.66667	0.453	0.538697
6060	101	1.68333	0.454	0.537678
6120	102	1.7	0.454	0.537678
6180	103	1.71667	0.454	0.537678
6240	104	1.73333	0.452	0.539715
6300	105	1.75	0.451	0.540733
6360	106	1.76667	0.451	0.540733
6420	107	1.78333	0.449	0.54277
6480	108	1.8	0.449	0.54277
6540	109	1.81667	0.449	0.54277
6600	110	1.83333	0.448	0.543788
6660	111	1.85	0.448	0.543788
6720	112	1.86667	0.447	0.544807
6780	113	1.88333	0.447	0.544807
6840	114	1.9	0.447	0.544807
6900	115	1.91667	0.447	0.544807
6960	116	1.93333	0.449	0.54277
7020	117	1.95	0.447	0.544807
7080	118	1.96667	0.446	0.545825
7140	119	1.98333	0.444	0.547862
7200	120	2	0.445	0.546843
7260	121	2.01667	0.442	0.549898
7320	122	2.03333	0.443	0.54888
7380	123	2.05	0.443	0.54888
7440	124	2.06667	0.442	0.549898
7500	125	2.08333	0.441	0.550916
7560	126	2.1	0.443	0.54888
7620	127	2.11667	0.44	0.551935
7680	128	2.13333	0.44	0.551935
7740	129	2.15	0.44	0.551935
7800	130	2.16667	0.439	0.552953
7860	131	2.18333	0.438	0.553971
7920	132	2.2	0.438	0.553971
7980	133	2.21667	0.437	0.55499
8040	134	2.23333	0.437	0.55499
8100	135	2.25	0.436	0.556008
8160	136	2.26667	0.435	0.557026
8220	137	2.28333	0.434	0.558045
8280	138	2.3	0.435	0.557026
8340	139	2.31667	0.433	0.559063
8400	140	2.33333	0.433	0.559063
8460	141	2.35	0.434	0.558045
8520	142	2.36667	0.433	0.559063
8580	143	2.38333	0.433	0.559063
8640	144	2.4	0.431	0.5611
8700	145	2.41667	0.431	0.5611
8760	146	2.43333	0.432	0.560081
8820	147	2.45	0.429	0.563136
8880	148	2.46667	0.431	0.5611
8940	149	2.48333	0.43	0.562118
9000	150	2.5	0.43	0.562118
9060	151	2.51667	0.429	0.563136
9120	152	2.53333	0.428	0.564155
9180	153	2.55	0.427	0.565173
9240	154	2.56667	0.426	0.566191
9300	155	2.58333	0.426	0.566191
9360	156	2.6	0.426	0.566191
9420	157	2.61667	0.428	0.564155
9480	158	2.63333	0.426	0.566191
9540	159	2.65	0.426	0.566191
9600	160	2.66667	0.425	0.56721
9660	161	2.68333	0.427	0.565173
9720	162	2.7	0.425	0.56721
9780	163	2.71667	0.423	0.569246
9840	164	2.73333	0.423	0.569246
9900	165	2.75	0.424	0.568228
9960	166	2.76667	0.423	0.569246
10020	167	2.78333	0.423	0.569246
10080	168	2.8	0.422	0.570265
10140	169	2.81667	0.422	0.570265
10200	170	2.83333	0.422	0.570265
10260	171	2.85	0.421	0.571283
10320	172	2.86667	0.42	0.572301
10380	173	2.88333	0.42	0.572301
10440	174	2.9	0.42	0.572301
10500	175	2.91667	0.42	0.572301
10560	176	2.93333	0.421	0.571283
10620	177	2.95	0.419	0.57332
10680	178	2.96667	0.419	0.57332
10740	179	2.98333	0.418	0.574338
10800	180	3	0.418	0.574338
10860	181	3.01667	0.419	0.57332
10920	182	3.03333	0.417	0.575356
10980	183	3.05	0.416	0.576375
11040	184	3.06667	0.416	0.576375
11100	185	3.08333	0.416	0.576375
11160	186	3.1	0.416	0.576375
11220	187	3.11667	0.416	0.576375
11280	188	3.13333	0.416	0.576375
11340	189	3.15	0.414	0.578411
11400	190	3.16667	0.415	0.577393
11460	191	3.18333	0.414	0.578411
11520	192	3.2	0.414	0.578411
11580	193	3.21667	0.414	0.578411
11640	194	3.23333	0.413	0.57943
11700	195	3.25	0.412	0.580448
11760	196	3.26667	0.412	0.580448
11820	197	3.28333	0.411	0.581466
11880	198	3.3	0.411	0.581466
11940	199	3.31667	0.412	0.580448
12000	200	3.33333	0.411	0.581466
12060	201	3.35	0.411	0.581466
12120	202	3.36667	0.41	0.582485
12180	203	3.38333	0.41	0.582485
12240	204	3.4	0.409	0.583503
12300	205	3.41667	0.409	0.583503
12360	206	3.43333	0.409	0.583503
12420	207	3.45	0.408	0.584521
12480	208	3.46667	0.407	0.58554
12540	209	3.48333	0.407	0.58554
12600	210	3.5	0.407	0.58554
12660	211	3.51667	0.407	0.58554
12720	212	3.53333	0.407	0.58554
12780	213	3.55	0.405	0.587576
12840	214	3.56667	0.406	0.586558
12900	215	3.58333	0.405	0.587576
12960	216	3.6	0.406	0.586558
13020	217	3.61667	0.405	0.587576
13080	218	3.63333	0.405	0.587576
13140	219	3.65	0.404	0.588595
13200	220	3.66667	0.403	0.589613
13260	221	3.68333	0.403	0.589613
13320	222	3.7	0.403	0.589613
13380	223	3.71667	0.404	0.588595
13440	224	3.73333	0.404	0.588595
13500	225	3.75	0.402	0.590631
13560	226	3.76667	0.403	0.589613
13620	227	3.78333	0.402	0.590631
13680	228	3.8	0.401	0.59165
13740	229	3.81667	0.399	0.593686
13800	230	3.83333	0.4	0.592668
13860	231	3.85	0.4	0.592668
13920	232	3.86667	0.4	0.592668
13980	233	3.88333	0.4	0.592668
14040	234	3.9	0.399	0.593686
14100	235	3.91667	0.399	0.593686
14160	236	3.93333	0.397	0.595723
14220	237	3.95	0.397	0.595723
14280	238	3.96667	0.398	0.594705
14340	239	3.98333	0.397	0.595723
14400	240	4	0.397	0.595723
14460	241	4.01667	0.396	0.596741
14520	242	4.03333	0.396	0.596741
14580	243	4.05	0.396	0.596741
14640	244	4.06667	0.395	0.59776

## Sheet: ES Ng Sw2
6	4001	0	0	550	1515702529	16980	60	0
Aparato:	Serial número:	Software:	Usuario:
Pharo 300	13041067	2.17-Merck-2.20
Hora de inicio	Longitud de onda [nm]
2018-01-11 12:28:49	550
Segundos	Minutos	Horas	Absorbancia	Porcentaje
0	0	0	0.775	0
60	1	0.0166667	0.78	-0.00645161
120	2	0.0333333	0.778	-0.00387097
180	3	0.05	0.776	-0.00129032
240	4	0.0666667	0.775	0
300	5	0.0833333	0.775	0
360	6	0.1	0.773	0.00258065
420	7	0.116667	0.775	0
480	8	0.133333	0.774	0.00129032
540	9	0.15	0.775	0
600	10	0.166667	0.773	0.00258065
660	11	0.183333	0.777	-0.00258065
720	12	0.2	0.778	-0.00387097
780	13	0.216667	0.778	-0.00387097
840	14	0.233333	0.777	-0.00258065
900	15	0.25	0.777	-0.00258065
960	16	0.266667	0.776	-0.00129032
1020	17	0.283333	0.777	-0.00258065
1080	18	0.3	0.776	-0.00129032
1140	19	0.316667	0.775	0
1200	20	0.333333	0.776	-0.00129032
1260	21	0.35	0.775	0
1320	22	0.366667	0.772	0.00387097
1380	23	0.383333	0.771	0.00516129
1440	24	0.4	0.771	0.00516129
1500	25	0.416667	0.771	0.00516129
1560	26	0.433333	0.771	0.00516129
1620	27	0.45	0.77	0.00645161
1680	28	0.466667	0.767	0.0103226
1740	29	0.483333	0.767	0.0103226
1800	30	0.5	0.765	0.0129032
1860	31	0.516667	0.766	0.0116129
1920	32	0.533333	0.764	0.0141935
1980	33	0.55	0.764	0.0141935
2040	34	0.566667	0.763	0.0154839
2100	35	0.583333	0.763	0.0154839
2160	36	0.6	0.763	0.0154839
2220	37	0.616667	0.762	0.0167742
2280	38	0.633333	0.761	0.0180645
2340	39	0.65	0.759	0.0206452
2400	40	0.666667	0.761	0.0180645
2460	41	0.683333	0.761	0.0180645
2520	42	0.7	0.76	0.0193548
2580	43	0.716667	0.76	0.0193548
2640	44	0.733333	0.76	0.0193548
2700	45	0.75	0.761	0.0180645
2760	46	0.766667	0.76	0.0193548
2820	47	0.783333	0.758	0.0219355
2880	48	0.8	0.76	0.0193548
2940	49	0.816667	0.759	0.0206452
3000	50	0.833333	0.759	0.0206452
3060	51	0.85	0.756	0.0245161
3120	52	0.866667	0.755	0.0258065
3180	53	0.883333	0.755	0.0258065
3240	54	0.9	0.755	0.0258065
3300	55	0.916667	0.754	0.0270968
3360	56	0.933333	0.753	0.0283871
3420	57	0.95	0.752	0.0296774
3480	58	0.966667	0.752	0.0296774
3540	59	0.983333	0.753	0.0283871
3600	60	1	0.751	0.0309677
3660	61	1.01667	0.752	0.0296774
3720	62	1.03333	0.75	0.0322581
3780	63	1.05	0.75	0.0322581
3840	64	1.06667	0.749	0.0335484
3900	65	1.08333	0.748	0.0348387
3960	66	1.1	0.748	0.0348387
4020	67	1.11667	0.748	0.0348387
4080	68	1.13333	0.746	0.0374194
4140	69	1.15	0.745	0.0387097
4200	70	1.16667	0.744	0.04
4260	71	1.18333	0.745	0.0387097
4320	72	1.2	0.745	0.0387097
4380	73	1.21667	0.744	0.04
4440	74	1.23333	0.745	0.0387097
4500	75	1.25	0.743	0.0412903
4560	76	1.26667	0.743	0.0412903
4620	77	1.28333	0.743	0.0412903
4680	78	1.3	0.743	0.0412903
4740	79	1.31667	0.742	0.0425806
4800	80	1.33333	0.741	0.043871
4860	81	1.35	0.74	0.0451613
4920	82	1.36667	0.74	0.0451613
4980	83	1.38333	0.739	0.0464516
5040	84	1.4	0.739	0.0464516
5100	85	1.41667	0.739	0.0464516
5160	86	1.43333	0.739	0.0464516
5220	87	1.45	0.737	0.0490323
5280	88	1.46667	0.736	0.0503226
5340	89	1.48333	0.734	0.0529032
5400	90	1.5	0.735	0.0516129
5460	91	1.51667	0.734	0.0529032
5520	92	1.53333	0.735	0.0516129
5580	93	1.55	0.735	0.0516129
5640	94	1.56667	0.732	0.0554839
5700	95	1.58333	0.733	0.0541935
5760	96	1.6	0.731	0.0567742
5820	97	1.61667	0.73	0.0580645
5880	98	1.63333	0.73	0.0580645
5940	99	1.65	0.729	0.0593548
6000	100	1.66667	0.73	0.0580645
6060	101	1.68333	0.728	0.0606452
6120	102	1.7	0.728	0.0606452
6180	103	1.71667	0.728	0.0606452
6240	104	1.73333	0.73	0.0580645
6300	105	1.75	0.727	0.0619355
6360	106	1.76667	0.726	0.0632258
6420	107	1.78333	0.727	0.0619355
6480	108	1.8	0.727	0.0619355
6540	109	1.81667	0.727	0.0619355
6600	110	1.83333	0.724	0.0658065
6660	111	1.85	0.726	0.0632258
6720	112	1.86667	0.722	0.0683871
6780	113	1.88333	0.723	0.0670968
6840	114	1.9	0.722	0.0683871
6900	115	1.91667	0.721	0.0696774
6960	116	1.93333	0.722	0.0683871
7020	117	1.95	0.72	0.0709677
7080	118	1.96667	0.721	0.0696774
7140	119	1.98333	0.719	0.0722581
7200	120	2	0.721	0.0696774
7260	121	2.01667	0.72	0.0709677
7320	122	2.03333	0.719	0.0722581
7380	123	2.05	0.718	0.0735484
7440	124	2.06667	0.718	0.0735484
7500	125	2.08333	0.718	0.0735484
7560	126	2.1	0.717	0.0748387
7620	127	2.11667	0.716	0.076129
7680	128	2.13333	0.714	0.0787097
7740	129	2.15	0.713	0.08
7800	130	2.16667	0.714	0.0787097
7860	131	2.18333	0.713	0.08
7920	132	2.2	0.712	0.0812903
7980	133	2.21667	0.712	0.0812903
8040	134	2.23333	0.713	0.08
8100	135	2.25	0.711	0.0825806
8160	136	2.26667	0.71	0.083871
8220	137	2.28333	0.71	0.083871
8280	138	2.3	0.71	0.083871
8340	139	2.31667	0.709	0.0851613
8400	140	2.33333	0.707	0.0877419
8460	141	2.35	0.707	0.0877419
8520	142	2.36667	0.706	0.0890323
8580	143	2.38333	0.706	0.0890323
8640	144	2.4	0.706	0.0890323
8700	145	2.41667	0.705	0.0903226
8760	146	2.43333	0.706	0.0890323
8820	147	2.45	0.704	0.0916129
8880	148	2.46667	0.703	0.0929032
8940	149	2.48333	0.702	0.0941935
9000	150	2.5	0.704	0.0916129
9060	151	2.51667	0.702	0.0941935
9120	152	2.53333	0.702	0.0941935
9180	153	2.55	0.701	0.0954839
9240	154	2.56667	0.7	0.0967742
9300	155	2.58333	0.699	0.0980645
9360	156	2.6	0.7	0.0967742
9420	157	2.61667	0.699	0.0980645
9480	158	2.63333	0.699	0.0980645
9540	159	2.65	0.698	0.0993548
9600	160	2.66667	0.698	0.0993548
9660	161	2.68333	0.698	0.0993548
9720	162	2.7	0.696	0.101935
9780	163	2.71667	0.696	0.101935
9840	164	2.73333	0.695	0.103226
9900	165	2.75	0.696	0.101935
9960	166	2.76667	0.694	0.104516
10020	167	2.78333	0.694	0.104516
10080	168	2.8	0.696	0.101935
10140	169	2.81667	0.693	0.105806
10200	170	2.83333	0.694	0.104516
10260	171	2.85	0.694	0.104516
10320	172	2.86667	0.692	0.107097
10380	173	2.88333	0.691	0.108387
10440	174	2.9	0.69	0.109677
10500	175	2.91667	0.691	0.108387
10560	176	2.93333	0.69	0.109677
10620	177	2.95	0.688	0.112258
10680	178	2.96667	0.689	0.110968
10740	179	2.98333	0.689	0.110968
10800	180	3	0.688	0.112258
10860	181	3.01667	0.688	0.112258
10920	182	3.03333	0.688	0.112258
10980	183	3.05	0.686	0.114839
11040	184	3.06667	0.686	0.114839
11100	185	3.08333	0.686	0.114839
11160	186	3.1	0.686	0.114839
11220	187	3.11667	0.684	0.117419
11280	188	3.13333	0.683	0.11871
11340	189	3.15	0.683	0.11871
11400	190	3.16667	0.684	0.117419
11460	191	3.18333	0.683	0.11871
11520	192	3.2	0.682	0.12
11580	193	3.21667	0.682	0.12
11640	194	3.23333	0.681	0.12129
11700	195	3.25	0.681	0.12129
11760	196	3.26667	0.679	0.123871
11820	197	3.28333	0.68	0.122581
11880	198	3.3	0.68	0.122581
11940	199	3.31667	0.68	0.122581
12000	200	3.33333	0.679	0.123871
12060	201	3.35	0.678	0.125161
12120	202	3.36667	0.679	0.123871
12180	203	3.38333	0.679	0.123871
12240	204	3.4	0.677	0.126452
12300	205	3.41667	0.676	0.127742
12360	206	3.43333	0.676	0.127742
12420	207	3.45	0.675	0.129032
12480	208	3.46667	0.674	0.130323
12540	209	3.48333	0.673	0.131613
12600	210	3.5	0.675	0.129032
12660	211	3.51667	0.674	0.130323
12720	212	3.53333	0.674	0.130323
12780	213	3.55	0.673	0.131613
12840	214	3.56667	0.673	0.131613
12900	215	3.58333	0.671	0.134194
12960	216	3.6	0.671	0.134194
13020	217	3.61667	0.671	0.134194
13080	218	3.63333	0.67	0.135484
13140	219	3.65	0.67	0.135484
13200	220	3.66667	0.67	0.135484
13260	221	3.68333	0.669	0.136774
13320	222	3.7	0.667	0.139355
13380	223	3.71667	0.668	0.138065
13440	224	3.73333	0.667	0.139355
13500	225	3.75	0.667	0.139355
13560	226	3.76667	0.666	0.140645
13620	227	3.78333	0.666	0.140645
13680	228	3.8	0.665	0.141935
13740	229	3.81667	0.665	0.141935
13800	230	3.83333	0.664	0.143226
13860	231	3.85	0.663	0.144516
13920	232	3.86667	0.663	0.144516
13980	233	3.88333	0.662	0.145806
14040	234	3.9	0.662	0.145806
14100	235	3.91667	0.661	0.147097
14160	236	3.93333	0.661	0.147097
14220	237	3.95	0.661	0.147097
14280	238	3.96667	0.661	0.147097
14340	239	3.98333	0.66	0.148387
14400	240	4	0.659	0.149677
14460	241	4.01667	0.659	0.149677
14520	242	4.03333	0.659	0.149677
14580	243	4.05	0.658	0.150968
14640	244	4.06667	0.656	0.153548
14700	245	4.08333	0.655	0.154839
14760	246	4.1	0.655	0.154839
14820	247	4.11667	0.655	0.154839
14880	248	4.13333	0.655	0.154839
14940	249	4.15	0.656	0.153548
15000	250	4.16667	0.655	0.154839
15060	251	4.18333	0.654	0.156129
15120	252	4.2	0.653	0.157419
15180	253	4.21667	0.652	0.15871
15240	254	4.23333	0.653	0.157419
15300	255	4.25	0.652	0.15871
15360	256	4.26667	0.651	0.16
15420	257	4.28333	0.651	0.16
15480	258	4.3	0.65	0.16129
15540	259	4.31667	0.65	0.16129
15600	260	4.33333	0.648	0.163871
15660	261	4.35	0.648	0.163871
15720	262	4.36667	0.649	0.162581
15780	263	4.38333	0.647	0.165161
15840	264	4.4	0.645	0.167742
15900	265	4.41667	0.645	0.167742
15960	266	4.43333	0.646	0.166452
16020	267	4.45	0.645	0.167742
16080	268	4.46667	0.645	0.167742
16140	269	4.48333	0.645	0.167742
16200	270	4.5	0.645	0.167742
16260	271	4.51667	0.643	0.170323
16320	272	4.53333	0.644	0.169032
16380	273	4.55	0.644	0.169032
16440	274	4.56667	0.642	0.171613
16500	275	4.58333	0.641	0.172903
16560	276	4.6	0.643	0.170323
16620	277	4.61667	0.641	0.172903
16680	278	4.63333	0.642	0.171613
16740	279	4.65	0.641	0.172903
16800	280	4.66667	0.642	0.171613
16860	281	4.68333	0.641	0.172903
16920	282	4.7	0.64	0.174194
16980	283	4.71667	0.64	0.174194

## Sheet: Average
		ES			*100			Resumen
	Horas	Tetraselmis marina AC16-MESO	Muriellopsis sp.	Nannochloropsis gaditana	Tetraselmis marina AC16-MESO	Muriellopsis sp.	Nannochloropsis gaditana	Hora	Tetraselmis marina AC16-MESO	Muriellopsis sp.	Nannochloropsis gaditana
	0	0	0	0	0	0	0	0	0	0	0
	0.0166667	0.0283533	0.0262626	0	2.83533	2.62626	0	0.2	0.527808	0.39697	-0.00387097
	0.0333333	0.0632497	0.040404	-0.00387097	6.32497	4.0404	-0.387097	0.4	0.727372	0.505051	0.00516129
	0.05	0.0992366	0.059596	-0.00129032	9.92366	5.9596	-0.129032	0.6	0.814613	0.556566	0.0154839
	0.0666667	0.135224	0.0939394	0	13.5224	9.39394	0	0.8	0.854962	0.586869	0.0193548
	0.0833333	0.178844	0.191919	0	17.8844	19.1919	0	1	0.877863	0.605051	0.0309677
	0.1	0.225736	0.322222	0.00258065	22.5736	32.2222	0.258065	1.2	0.898582	0.621212	0.0387097
	0.116667	0.374046	0.369697	0	37.4046	36.9697	0	1.4	0.909487	0.628283	0.0464516
	0.133333	0.466739	0.406061	0.00129032	46.6739	40.6061	0.129032	1.6	0.918212	0.641414	0.0567742
	0.15	0.479826	0.371717	0	47.9826	37.1717	0	1.8	0.925845	0.651515	0.0619355
	0.166667	0.545256	0.40101	0.00258065	54.5256	40.101	0.258065	2	0.932388	0.658586	0.0696774
	0.183333	0.594329	0.434343	-0.00258065	59.4329	43.4343	-0.258065	2.2	0.93566	0.662626	0.0812903
	0.2	0.527808	0.39697	-0.00387097	52.7808	39.697	-0.387097	2.4	0.938931	0.667677	0.0890323
	0.216667	0.570338	0.423232	-0.00387097	57.0338	42.3232	-0.387097	2.6	0.942203	0.673737	0.0967742
	0.233333	0.603053	0.413131	-0.00258065	60.3053	41.3131	-0.258065	2.8	0.945474	0.677778	0.101935
	0.25	0.608506	0.457576	-0.00258065	60.8506	45.7576	-0.258065	3	0.947655	0.681818	0.112258
	0.266667	0.61614	0.442424	-0.00129032	61.614	44.2424	-0.129032	3.2	0.948746	0.685859	0.12
	0.283333	0.649945	0.470707	-0.00258065	64.9945	47.0707	-0.258065	3.4	0.950927	0.688889	0.126452
	0.3	0.660851	0.466667	-0.00129032	66.0851	46.6667	-0.129032	3.6	0.950927	0.691919	0.134194
	0.316667	0.68157	0.476768	0	68.157	47.6768	0	3.8	0.953108	0.694949	0.141935
	0.333333	0.684842	0.480808	-0.00129032	68.4842	48.0808	-0.129032	4	0.953108	0.7	0.149677
	0.35	0.695747	0.482828	0	69.5747	48.2828	0	4.2	0.954198	0.70202	0.157419
	0.366667	0.704471	0.493939	0.00387097	70.4471	49.3939	0.387097	4.4	0.954198	0.706061	0.167742
	0.383333	0.711014	0.49697	0.00516129	71.1014	49.697	0.516129	4.6	0.954198	0.709091	0.170323
	0.4	0.727372	0.505051	0.00516129	72.7372	50.5051	0.516129	4.8	0.95523	0.713365	0.178991
	0.416667	0.733915	0.515152	0.00516129	73.3915	51.5152	0.516129	5	0.956234	0.713653	0.189524
	0.433333	0.739368	0.518182	0.00516129	73.9368	51.8182	0.516129
	0.45	0.748092	0.526263	0.00645161	74.8092	52.6263	0.645161
	0.466667	0.762268	0.531313	0.0103226	76.2268	53.1313	1.03226
	0.483333	0.760087	0.528283	0.0103226	76.0087	52.8283	1.03226
	0.5	0.76554	0.535354	0.0129032	76.554	53.5354	1.29032
	0.516667	0.784079	0.538384	0.0116129	78.4079	53.8384	1.16129
	0.533333	0.789531	0.543434	0.0141935	78.9531	54.3434	1.41935
	0.55	0.793893	0.547475	0.0141935	79.3893	54.7475	1.41935
	0.566667	0.798255	0.551515	0.0154839	79.8255	55.1515	1.54839
	0.583333	0.806979	0.552525	0.0154839	80.6979	55.2525	1.54839
	0.6	0.814613	0.556566	0.0154839	81.4613	55.6566	1.54839
	0.616667	0.813522	0.560606	0.0167742	81.3522	56.0606	1.67742
	0.633333	0.820065	0.564646	0.0180645	82.0065	56.4646	1.80645
	0.65	0.824427	0.564646	0.0206452	82.4427	56.4646	2.06452
	0.666667	0.827699	0.567677	0.0180645	82.7699	56.7677	1.80645
	0.683333	0.836423	0.570707	0.0180645	83.6423	57.0707	1.80645
	0.7	0.834242	0.574747	0.0193548	83.4242	57.4747	1.93548
	0.716667	0.837514	0.573737	0.0193548	83.7514	57.3737	1.93548
	0.733333	0.841876	0.576768	0.0193548	84.1876	57.6768	1.93548
	0.75	0.846238	0.580808	0.0180645	84.6238	58.0808	1.80645
	0.766667	0.848419	0.579798	0.0193548	84.8419	57.9798	1.93548
	0.783333	0.8506	0.582828	0.0219355	85.06	58.2828	2.19355
	0.8	0.854962	0.586869	0.0193548	85.4962	58.6869	1.93548
	0.816667	0.858233	0.586869	0.0206452	85.8233	58.6869	2.06452
	0.833333	0.856052	0.590909	0.0206452	85.6052	59.0909	2.06452
	0.85	0.864776	0.592929	0.0245161	86.4776	59.2929	2.45161
	0.866667	0.865867	0.592929	0.0258065	86.5867	59.2929	2.58065
	0.883333	0.864776	0.594949	0.0258065	86.4776	59.4949	2.58065
	0.9	0.868048	0.594949	0.0258065	86.8048	59.4949	2.58065
	0.916667	0.868048	0.59697	0.0270968	86.8048	59.697	2.70968
	0.933333	0.870229	0.60101	0.0283871	87.0229	60.101	2.83871
	0.95	0.873501	0.60101	0.0296774	87.3501	60.101	2.96774
	0.966667	0.875682	0.60101	0.0296774	87.5682	60.101	2.96774
	0.983333	0.875682	0.605051	0.0283871	87.5682	60.5051	2.83871
	1	0.877863	0.605051	0.0309677	87.7863	60.5051	3.09677
	1.01667	0.882225	0.609091	0.0296774	88.2225	60.9091	2.96774
	1.03333	0.885496	0.610101	0.0322581	88.5496	61.0101	3.22581
	1.05	0.884406	0.611111	0.0322581	88.4406	61.1111	3.22581
	1.06667	0.884406	0.611111	0.0335484	88.4406	61.1111	3.35484
	1.08333	0.886587	0.611111	0.0348387	88.6587	61.1111	3.48387
	1.1	0.888768	0.614141	0.0348387	88.8768	61.4141	3.48387
	1.11667	0.889858	0.616162	0.0348387	88.9858	61.6162	3.48387
	1.13333	0.892039	0.616162	0.0374194	89.2039	61.6162	3.74194
	1.15	0.892039	0.615152	0.0387097	89.2039	61.5152	3.87097
	1.16667	0.892039	0.617172	0.04	89.2039	61.7172	4
	1.18333	0.89422	0.619192	0.0387097	89.422	61.9192	3.87097
	1.2	0.898582	0.621212	0.0387097	89.8582	62.1212	3.87097
	1.21667	0.899673	0.620202	0.04	89.9673	62.0202	4
	1.23333	0.901854	0.620202	0.0387097	90.1854	62.0202	3.87097
	1.25	0.900763	0.619192	0.0412903	90.0763	61.9192	4.12903
	1.26667	0.901854	0.622222	0.0412903	90.1854	62.2222	4.12903
	1.28333	0.902944	0.623232	0.0412903	90.2944	62.3232	4.12903
	1.3	0.902944	0.625253	0.0412903	90.2944	62.5253	4.12903
	1.31667	0.902944	0.625253	0.0425806	90.2944	62.5253	4.25806
	1.33333	0.906216	0.626263	0.043871	90.6216	62.6263	4.3871
	1.35	0.907306	0.628283	0.0451613	90.7306	62.8283	4.51613
	1.36667	0.908397	0.628283	0.0451613	90.8397	62.8283	4.51613
	1.38333	0.908397	0.628283	0.0464516	90.8397	62.8283	4.64516
	1.4	0.909487	0.628283	0.0464516	90.9487	62.8283	4.64516
	1.41667	0.911668	0.631313	0.0464516	91.1668	63.1313	4.64516
	1.43333	0.911668	0.630303	0.0464516	91.1668	63.0303	4.64516
	1.45	0.911668	0.634343	0.0490323	91.1668	63.4343	4.90323
	1.46667	0.912759	0.633333	0.0503226	91.2759	63.3333	5.03226
	1.48333	0.91385	0.634343	0.0529032	91.385	63.4343	5.29032
	1.5	0.91494	0.634343	0.0516129	91.494	63.4343	5.16129
	1.51667	0.916031	0.634343	0.0529032	91.6031	63.4343	5.29032
	1.53333	0.917121	0.635354	0.0516129	91.7121	63.5354	5.16129
	1.55	0.918212	0.636364	0.0516129	91.8212	63.6364	5.16129
	1.56667	0.917121	0.637374	0.0554839	91.7121	63.7374	5.54839
	1.58333	0.919302	0.639394	0.0541935	91.9302	63.9394	5.41935
	1.6	0.918212	0.641414	0.0567742	91.8212	64.1414	5.67742
	1.61667	0.918212	0.642424	0.0580645	91.8212	64.2424	5.80645
	1.63333	0.921483	0.641414	0.0580645	92.1483	64.1414	5.80645
	1.65	0.920393	0.643434	0.0593548	92.0393	64.3434	5.93548
	1.66667	0.920393	0.646465	0.0580645	92.0393	64.6465	5.80645
	1.68333	0.923664	0.646465	0.0606452	92.3664	64.6465	6.06452
	1.7	0.923664	0.646465	0.0606452	92.3664	64.6465	6.06452
	1.71667	0.923664	0.647475	0.0606452	92.3664	64.7475	6.06452
	1.73333	0.923664	0.647475	0.0580645	92.3664	64.7475	5.80645
	1.75	0.926936	0.647475	0.0619355	92.6936	64.7475	6.19355
	1.76667	0.925845	0.649495	0.0632258	92.5845	64.9495	6.32258
	1.78333	0.926936	0.651515	0.0619355	92.6936	65.1515	6.19355
	1.8	0.925845	0.651515	0.0619355	92.5845	65.1515	6.19355
	1.81667	0.926936	0.650505	0.0619355	92.6936	65.0505	6.19355
	1.83333	0.928026	0.653535	0.0658065	92.8026	65.3535	6.58065
	1.85	0.928026	0.652525	0.0632258	92.8026	65.2525	6.32258
	1.86667	0.926936	0.653535	0.0683871	92.6936	65.3535	6.83871
	1.88333	0.929117	0.654545	0.0670968	92.9117	65.4545	6.70968
	1.9	0.928026	0.653535	0.0683871	92.8026	65.3535	6.83871
	1.91667	0.930207	0.654545	0.0696774	93.0207	65.4545	6.96774
	1.93333	0.929117	0.654545	0.0683871	92.9117	65.4545	6.83871
	1.95	0.931298	0.655556	0.0709677	93.1298	65.5556	7.09677
	1.96667	0.930207	0.654545	0.0696774	93.0207	65.4545	6.96774
	1.98333	0.931298	0.655556	0.0722581	93.1298	65.5556	7.22581
	2	0.932388	0.658586	0.0696774	93.2388	65.8586	6.96774
	2.01667	0.932388	0.657576	0.0709677	93.2388	65.7576	7.09677
	2.03333	0.934569	0.656566	0.0722581	93.4569	65.6566	7.22581
	2.05	0.93675	0.656566	0.0735484	93.675	65.6566	7.35484
	2.06667	0.932388	0.658586	0.0735484	93.2388	65.8586	7.35484
	2.08333	0.934569	0.658586	0.0735484	93.4569	65.8586	7.35484
	2.1	0.934569	0.658586	0.0748387	93.4569	65.8586	7.48387
	2.11667	0.934569	0.660606	0.076129	93.4569	66.0606	7.6129
	2.13333	0.933479	0.660606	0.0787097	93.3479	66.0606	7.87097
	2.15	0.93566	0.659596	0.08	93.566	65.9596	8
	2.16667	0.93675	0.661616	0.0787097	93.675	66.1616	7.87097
	2.18333	0.93566	0.662626	0.08	93.566	66.2626	8
	2.2	0.93566	0.662626	0.0812903	93.566	66.2626	8.12903
	2.21667	0.93675	0.662626	0.0812903	93.675	66.2626	8.12903
	2.23333	0.93675	0.663636	0.08	93.675	66.3636	8
	2.25	0.937841	0.664646	0.0825806	93.7841	66.4646	8.25806
	2.26667	0.93675	0.665657	0.083871	93.675	66.5657	8.3871
	2.28333	0.937841	0.665657	0.083871	93.7841	66.5657	8.3871
	2.3	0.938931	0.666667	0.083871	93.8931	66.6667	8.3871
	2.31667	0.938931	0.667677	0.0851613	93.8931	66.7677	8.51613
	2.33333	0.937841	0.667677	0.0877419	93.7841	66.7677	8.77419
	2.35	0.937841	0.666667	0.0877419	93.7841	66.6667	8.77419
	2.36667	0.937841	0.667677	0.0890323	93.7841	66.7677	8.90323
	2.38333	0.938931	0.667677	0.0890323	93.8931	66.7677	8.90323
	2.4	0.938931	0.667677	0.0890323	93.8931	66.7677	8.90323
	2.41667	0.938931	0.668687	0.0903226	93.8931	66.8687	9.03226
	2.43333	0.938931	0.667677	0.0890323	93.8931	66.7677	8.90323
	2.45	0.940022	0.668687	0.0916129	94.0022	66.8687	9.16129
	2.46667	0.942203	0.669697	0.0929032	94.2203	66.9697	9.29032
	2.48333	0.941112	0.670707	0.0941935	94.1112	67.0707	9.41935
	2.5	0.943293	0.670707	0.0916129	94.3293	67.0707	9.16129
	2.51667	0.942203	0.669697	0.0941935	94.2203	66.9697	9.41935
	2.53333	0.943293	0.671717	0.0941935	94.3293	67.1717	9.41935
	2.55	0.943293	0.671717	0.0954839	94.3293	67.1717	9.54839
	2.56667	0.942203	0.671717	0.0967742	94.2203	67.1717	9.67742
	2.58333	0.942203	0.672727	0.0980645	94.2203	67.2727	9.80645
	2.6	0.942203	0.673737	0.0967742	94.2203	67.3737	9.67742
	2.61667	0.942203	0.673737	0.0980645	94.2203	67.3737	9.80645
	2.63333	0.943293	0.673737	0.0980645	94.3293	67.3737	9.80645
	2.65	0.944384	0.674747	0.0993548	94.4384	67.4747	9.93548
	2.66667	0.943293	0.672727	0.0993548	94.3293	67.2727	9.93548
	2.68333	0.942203	0.674747	0.0993548	94.2203	67.4747	9.93548
	2.7	0.944384	0.674747	0.101935	94.4384	67.4747	10.1935
	2.71667	0.944384	0.674747	0.101935	94.4384	67.4747	10.1935
	2.73333	0.944384	0.674747	0.103226	94.4384	67.4747	10.3226
	2.75	0.944384	0.674747	0.101935	94.4384	67.4747	10.1935
	2.76667	0.944384	0.675758	0.104516	94.4384	67.5758	10.4516
	2.78333	0.945474	0.676768	0.104516	94.5474	67.6768	10.4516
	2.8	0.945474	0.677778	0.101935	94.5474	67.7778	10.1935
	2.81667	0.944384	0.675758	0.105806	94.4384	67.5758	10.5806
	2.83333	0.944384	0.677778	0.104516	94.4384	67.7778	10.4516
	2.85	0.946565	0.677778	0.104516	94.6565	67.7778	10.4516
	2.86667	0.944384	0.678788	0.107097	94.4384	67.8788	10.7097
	2.88333	0.945474	0.677778	0.108387	94.5474	67.7778	10.8387
	2.9	0.946565	0.678788	0.109677	94.6565	67.8788	10.9677
	2.91667	0.946565	0.679798	0.108387	94.6565	67.9798	10.8387
	2.93333	0.946565	0.679798	0.109677	94.6565	67.9798	10.9677
	2.95	0.946565	0.679798	0.112258	94.6565	67.9798	11.2258
	2.96667	0.947655	0.680808	0.110968	94.7655	68.0808	11.0968
	2.98333	0.947655	0.681818	0.110968	94.7655	68.1818	11.0968
	3	0.947655	0.681818	0.112258	94.7655	68.1818	11.2258
	3.01667	0.947655	0.682828	0.112258	94.7655	68.2828	11.2258
	3.03333	0.946565	0.681818	0.112258	94.6565	68.1818	11.2258
	3.05	0.947655	0.680808	0.114839	94.7655	68.0808	11.4839
	3.06667	0.947655	0.681818	0.114839	94.7655	68.1818	11.4839
	3.08333	0.947655	0.682828	0.114839	94.7655	68.2828	11.4839
	3.1	0.948746	0.683838	0.114839	94.8746	68.3838	11.4839
	3.11667	0.947655	0.681818	0.117419	94.7655	68.1818	11.7419
	3.13333	0.948746	0.682828	0.11871	94.8746	68.2828	11.871
	3.15	0.948746	0.684848	0.11871	94.8746	68.4848	11.871
	3.16667	0.948746	0.684848	0.117419	94.8746	68.4848	11.7419
	3.18333	0.949836	0.685859	0.11871	94.9836	68.5859	11.871
	3.2	0.948746	0.685859	0.12	94.8746	68.5859	12
	3.21667	0.949836	0.685859	0.12	94.9836	68.5859	12
	3.23333	0.948746	0.684848	0.12129	94.8746	68.4848	12.129
	3.25	0.948746	0.686869	0.12129	94.8746	68.6869	12.129
	3.26667	0.948746	0.686869	0.123871	94.8746	68.6869	12.3871
	3.28333	0.949836	0.687879	0.122581	94.9836	68.7879	12.2581
	3.3	0.949836	0.686869	0.122581	94.9836	68.6869	12.2581
	3.31667	0.950927	0.685859	0.122581	95.0927	68.5859	12.2581
	3.33333	0.950927	0.685859	0.123871	95.0927	68.5859	12.3871
	3.35	0.949836	0.686869	0.125161	94.9836	68.6869	12.5161
	3.36667	0.949836	0.687879	0.123871	94.9836	68.7879	12.3871
	3.38333	0.949836	0.687879	0.123871	94.9836	68.7879	12.3871
	3.4	0.950927	0.688889	0.126452	95.0927	68.8889	12.6452
	3.41667	0.948746	0.687879	0.127742	94.8746	68.7879	12.7742
	3.43333	0.949836	0.688889	0.127742	94.9836	68.8889	12.7742
	3.45	0.950927	0.688889	0.129032	95.0927	68.8889	12.9032
	3.46667	0.950927	0.688889	0.130323	95.0927	68.8889	13.0323
	3.48333	0.950927	0.689899	0.131613	95.0927	68.9899	13.1613
	3.5	0.949836	0.690909	0.129032	94.9836	69.0909	12.9032
	3.51667	0.950927	0.690909	0.130323	95.0927	69.0909	13.0323
	3.53333	0.949836	0.690909	0.130323	94.9836	69.0909	13.0323
	3.55	0.950927	0.690909	0.131613	95.0927	69.0909	13.1613
	3.56667	0.950927	0.690909	0.131613	95.0927	69.0909	13.1613
	3.58333	0.950927	0.690909	0.134194	95.0927	69.0909	13.4194
	3.6	0.950927	0.691919	0.134194	95.0927	69.1919	13.4194
	3.61667	0.952017	0.692929	0.134194	95.2017	69.2929	13.4194
	3.63333	0.952017	0.691919	0.135484	95.2017	69.1919	13.5484
	3.65	0.952017	0.692929	0.135484	95.2017	69.2929	13.5484
	3.66667	0.950927	0.692929	0.135484	95.0927	69.2929	13.5484
	3.68333	0.952017	0.693939	0.136774	95.2017	69.3939	13.6774
	3.7	0.952017	0.693939	0.139355	95.2017	69.3939	13.9355
	3.71667	0.952017	0.694949	0.138065	95.2017	69.4949	13.8065
	3.73333	0.952017	0.693939	0.139355	95.2017	69.3939	13.9355
	3.75	0.952017	0.694949	0.139355	95.2017	69.4949	13.9355
	3.76667	0.952017	0.694949	0.140645	95.2017	69.4949	14.0645
	3.78333	0.952017	0.693939	0.140645	95.2017	69.3939	14.0645
	3.8	0.953108	0.694949	0.141935	95.3108	69.4949	14.1935
	3.81667	0.952017	0.694949	0.141935	95.2017	69.4949	14.1935
	3.83333	0.952017	0.69596	0.143226	95.2017	69.596	14.3226
	3.85	0.952017	0.69596	0.144516	95.2017	69.596	14.4516
	3.86667	0.952017	0.69697	0.144516	95.2017	69.697	14.4516
	3.88333	0.952017	0.69697	0.145806	95.2017	69.697	14.5806
	3.9	0.953108	0.69697	0.145806	95.3108	69.697	14.5806
	3.91667	0.952017	0.69899	0.147097	95.2017	69.899	14.7097
	3.93333	0.953108	0.69798	0.147097	95.3108	69.798	14.7097
	3.95	0.952017	0.69798	0.147097	95.2017	69.798	14.7097
	3.96667	0.953108	0.69798	0.147097	95.3108	69.798	14.7097
	3.98333	0.953108	0.69899	0.148387	95.3108	69.899	14.8387
	4	0.953108	0.7	0.149677	95.3108	70	14.9677
	4.01667	0.953108	0.69899	0.149677	95.3108	69.899	14.9677
	4.03333	0.953108	0.69899	0.149677	95.3108	69.899	14.9677
	4.05	0.952017	0.7	0.150968	95.2017	70	15.0968
	4.06667	0.953108	0.70101	0.153548	95.3108	70.101	15.3548
	4.08333	0.953108	0.70101	0.154839	95.3108	70.101	15.4839
	4.1	0.953108	0.7	0.154839	95.3108	70	15.4839
	4.11667	0.953108	0.7	0.154839	95.3108	70	15.4839
	4.13333	0.954198	0.70101	0.154839	95.4198	70.101	15.4839
	4.15	0.953108	0.70101	0.153548	95.3108	70.101	15.3548
	4.16667	0.953108	0.70202	0.154839	95.3108	70.202	15.4839
	4.18333	0.954198	0.70202	0.156129	95.4198	70.202	15.6129
	4.2	0.954198	0.70202	0.157419	95.4198	70.202	15.7419
	4.21667	0.954198	0.70303	0.15871	95.4198	70.303	15.871
	4.23333	0.954198	0.70303	0.157419	95.4198	70.303	15.7419
	4.25	0.954198	0.70404	0.15871	95.4198	70.404	15.871
	4.26667	0.954198	0.70404	0.16	95.4198	70.404	16
	4.28333	0.954198	0.70303	0.16	95.4198	70.303	16
	4.3	0.954198	0.70404	0.16129	95.4198	70.404	16.129
	4.31667	0.954198	0.70404	0.16129	95.4198	70.404	16.129
	4.33333	0.954198	0.70404	0.163871	95.4198	70.404	16.3871
	4.35	0.955289	0.705051	0.163871	95.5289	70.5051	16.3871
	4.36667	0.955289	0.70404	0.162581	95.5289	70.404	16.2581
	4.38333	0.955289	0.705051	0.165161	95.5289	70.5051	16.5161
	4.4	0.954198	0.706061	0.167742	95.4198	70.6061	16.7742
	4.41667	0.954198	0.706061	0.167742	95.4198	70.6061	16.7742
	4.43333	0.954198	0.706061	0.166452	95.4198	70.6061	16.6452
	4.45	0.954198	0.706061	0.167742	95.4198	70.6061	16.7742
	4.46667	0.955289	0.707071	0.167742	95.5289	70.7071	16.7742
	4.48333	0.955289	0.707071	0.167742	95.5289	70.7071	16.7742
	4.5	0.955289	0.706061	0.167742	95.5289	70.6061	16.7742
	4.51667	0.954198	0.707071	0.170323	95.4198	70.7071	17.0323
	4.53333	0.955289	0.707071	0.169032	95.5289	70.7071	16.9032
	4.55	0.955289	0.708081	0.169032	95.5289	70.8081	16.9032
	4.56667	0.955289	0.707071	0.171613	95.5289	70.7071	17.1613
	4.58333	0.955289	0.708081	0.172903	95.5289	70.8081	17.2903
	4.6	0.954198	0.709091	0.170323	95.4198	70.9091	17.0323
	4.61667	0.954198	0.710101	0.172903	95.4198	71.0101	17.2903
	4.63333	0.954379	0.710101	0.171613	95.4379	71.0101	17.1613
	4.65	0.955289	0.710101	0.172903	95.5289	71.0101	17.2903
	4.66667	0.954198	0.711111	0.171613	95.4198	71.1111	17.1613
	4.68333	0.955289	0.710101	0.172903	95.5289	71.0101	17.2903
	4.7	0.955289	0.711111	0.174194	95.5289	71.1111	17.4194
	4.71667	0.955289	0.711111	0.174194	95.5289	71.1111	17.4194
	4.73333	0.955289	0.711111	0.175321	95.5289	71.1111	17.5321
	4.75	0.955289	0.711111	0.175321	95.5289	71.1111	17.5321
	4.76667	0.955289	0.711111	0.176234	95.5289	71.1111	17.6234
	4.78333	0.955289	0.711111	0.176234	95.5289	71.1111	17.6234
	4.8	0.95523	0.713365	0.178991	95.523	71.3365	17.8991
	4.81667	0.956234	0.713653	0.178991	95.6234	71.3653	17.8991
	4.83	0.956234	0.713653	0.181324	95.6235	71.3653	18.1324
	4.85	0.956234	0.713653	0.181324	95.6235	71.3653	18.1324
	4.86	0.956234	0.713653	0.181324	95.6235	71.3653	18.1324
	4.88	0.956234	0.713653	0.184524	95.6235	71.3653	18.4524
	4.9	0.956234	0.713653	0.184524	95.6235	71.3653	18.4524
	4.92	0.956234	0.713653	0.184524	95.6235	71.3653	18.4524
	4.94	0.956234	0.713653	0.185624	95.6235	71.3653	18.5624
	4.96	0.956234	0.713653	0.186824	95.6235	71.3653	18.6824
	4.98	0.956234	0.713653	0.189524	95.6235	71.3653	18.9524
	5	0.956234	0.713653	0.189524	95.6235	71.3653	18.9524
