# Supplementary material for: The effect of heavy metals on the viability of Tetraselmis marina AC16-MESO and an evaluation of the potential use of this microalga in bioremediation
Source: PeerJ. 2018 Jul 25;6:e5295. doi: 10.7717/peerj.5295 (PMC6064205; doi:10.7717/peerj.5295)
Supplement: Figure S2 — Tetraselmis marina AC16-MESO at different concentration of metal ions. () Co2+; (■) Ni+2; (•) Mn2+; (\documentclass[12pt]{minimal} \usepackage{amsmath} \usepackage{wasysym} \usepackage{amsfonts} \usepackage{amssymb} \usepackage{amsbsy} \usepackage{upgreek} \usepackage{mathrsfs} \setlength{\oddsidemargin}{-69pt} \begin{document} }{}$○ $\end{document}○) Cu2+; (♦) Fe3+ and (■) Ca2+. The y-axis shows the inhibition ratio (%) for each ion at concentrations of 0.0 (control), 0.001, 0.01, 0.1, 1, 5, 10, 20, 40, 80 and 100 mg*L−1. The EC50 was determined for each ion. [file peerj-06-5295-s002.xlsx]

## Sheet: Ec50
Día 3												equation
	1	2	3	4	5	6	7	8	9	10		1050153,16*(1)+3483,29
Calcio	0.237154	0.17939	0.206689	0.205312	0.210924	0.213943	0.20957	0.219505	0.256522	0.268666
	0.228328	0.178882	0.162975	0.178949	0.186807	0.188686	0.191809	0.176559	0.189785	0.216664
	0.238585	0.187204	0.239633	0.178815	0.125862	0.182182	0.0772852	0.0581985	-0.0107414	-0.0525508
	0.0409508	0.0402706	0.0429529	0.0428014	0.0347742	0.0575154	0.0375645	0.0391542	0.0445098	0.0527624
Cobalto	0.235509	0.217012	0.158083	0.13449	0.0986135	0.0744685	0.00979826	0.096757	0.0669707	0.0616966
	0.231139	0.195881	0.175659	0.0736769	0.0806818	0.0576916	0.060719	0.0268053	0.0554769	0.05637
	0.223998	0.104132	0.0743139	0.0696196	0.0638244	0.0594141	0.0521262	0.0302973	0.0148186	0.0319255
	0.0383346	0.0410803	0.0416726	0.0418043	0.0386942	0.0389713	0.0408811	0.0512866	0.0457554	0.0499974
Cobre	0.249164	0.220444	0.206403	0.167473	0.155044	0.165143	0.196818	0.21107	0.245761	0.258527
	0.231202	0.217879	0.195913	0.134625	0.14117	0.258062	0.155217	0.19623	0.190282	0.204751
	0.228344	0.226316	0.211211	0.15366	0.148401	0.035147	0.176222	0.12337	-0.0590059	-0.0577294
	0.0418132	0.0412028	0.0468685	0.0448705	0.055185	0.0724734	0.0983996	0.124539	0.125679	0.135183
Hierro	0.227468	0.211973	0.177061	0.136984	0.141129	0.161043	0.211507	0.123126	0.0816957	0.0142991
	0.237581	0.209378	0.175488	0.166091	0.161907	0.153338	0.216114	0.172532	0.0691399	0.212886
	0.229086	0.255345	0.179525	0.196007	0.177225	0.160716	0.0235477	0.15354	0.0919455	-0.00127617
	0.0391326	0.0413785	0.0410909	0.0432402	0.0511392	0.0533767	0.0543605	0.0595548	0.0617572	0.0666339
Manganeso	0.234956	0.223164	0.208236	0.162909	0.208171	0.16299	0.146764	0.122081	0.0779994	0.0871978
	0.235384	0.224074	0.250612	0.144328	0.122884	0.121736	0.0738058	0.0471417	0.0508056	0.0796507
	0.239505	0.222407	0.18824	0.137593	0.0379951	0.0278784	0.0367117	0.0909068	0.102506	0.0431895
	0.0418565	0.0406933	0.0419976	0.0423997	0.0448435	0.0454255	0.0418082	0.0445635	0.0490534	0.0624761
Niquel	0.239275	0.239591	0.219244	0.189053	0.132168	0.120863	0.110494	0.145472	0.116703	0.13467
	0.241976	0.227476	0.197822	0.156292	0.149507	0.130722	0.122414	0.138341	0.130369	0.205502
	0.233446	0.171274	0.120808	0.123036	0.0436692	0.0962842	0.469559	0.596273	1.52099	1.65944
	0.0396907	0.0420846	0.0421	0.0420768	0.0607699	0.0919177	0.234156	0.293362	0.589354	0.666537
Calcio	252531	191870	220538	219092	224986	228156	223564	233997	272870	285623
	243262	191337	174632	191407	199659	201633	204912	188897	202787	231014
	254034	200076	255135	191266	135658	194802	84644.5	64600.6	-7796.85	-51703.1
	46487.9	45773.6	48590.4	48431.3	40001.5	63883.3	42931.8	44601.2	50225.3	58891.9
Cobalto	250804	231379	169495	144718	107043	81686.6	13773	105093	73812.8	68274.2
	246214	209188	187952	80855.4	88211.5	64068.3	67247.5	31633	61742.5	62680.4
	238715	112838	81524.2	76594.6	70508.7	65877.2	58223.8	35300.1	19045.1	37009.9
	43740.5	46623.9	47245.9	47384.3	44118.2	44409.1	46414.7	57342	51533.5	55988.2
Cobre	265143	234984	220238	179356	166303	176909	210172	225139	261570	274976
	246280	232290	209222	144860	151734	274488	166484	209555	203309	218503
	243279	241150	225287	164850	159327	40393	188544	133040	-58481.9	-57141.4
	47393.6	46752.5	52702.4	50604.1	61436	79591.5	106818	134268	135466	145446
Hierro	242359	226087	189424	147338	151690	172603	225598	132784	89276.3	18499.5
	252980	223362	187772	177905	173510	164512	230436	184668	76090.8	227046
	244059	271634	192012	209320	189596	172259	28212	164724	100040	2143.12
	44578.5	46937	46635	48892.1	57187.2	59537	60570.2	66024.9	68337.9	73459.1
Manganeso	250223	237840	222163	174562	222095	174648	157608	131687	85394.6	95054.3
	250673	238796	266664	155050	132530	131324	80990.7	52989.3	56837	87128.7
	255000	237044	201164	147977	43384	32759.8	42036.2	98949.3	111131	48838.9
	47439	46217.5	47587.1	48009.4	50575.8	51187	47388.3	50281.8	54996.9	69092.8
Niquel	254758	255091	233723	202018	142280	130408	119519	156251	126040	144908
	257596	242368	211226	167614	160489	140762	132037	148762	140391	219292
	248638	183347	130350	132689	49342.6	104596	496592	629661	1.60075e+06	1.74615e+06
	45164.6	47678.5	47694.7	47670.4	67301	100011	249383	311558	622395	703450
Cel*mL-1	1	10	100	1000	5000	10000	20000	40000	80000	100000
Calcio	203455	148654	168178	152157	146766	144314	128108	117897	105728	96086.2
Cobalto	201504	137845	99077.7	53338.5	44469.4	26134.9	0	0	0	0
Cobre	204174	189389	165546	112418	97685	84338.3	81582.3	54976.8	0	0
Hierro	201888	193424	143101	129295	114412	110255	100845	94700.5	20131.2	9103.89
Manganeso	204526	191676	182410	111187	82093.9	61723.7	46156.7	44260	29457.2	7914.49
Niquel	208499	179257	144072	119770	50069.5	25244.6	0	0	0	0
DS
Calcio	5833.9	4898.91	40383.6	16024.7	46038.4	17619.3	75399.8	87729.6	146077	181062
Cobalto	6102.24	63018.2	56871.7	38160.9	18269.9	9692.05	28626.4	41394.2	28775.7	16671.9
Cobre	11852.1	4542.11	8215.21	17320.4	7286.78	117586	21844.3	49294.2	170471	177703
Hierro	5704.8	27117.6	2136.98	30992.3	19025.2	4575.53	115383	26172	11995	125393
Manganeso	2637.5	876.887	33445.2	13769	89355.5	72714.1	58800	39533.5	27159	24714.3
Niquel	4578.1	38280.5	54364.4	34664.6	59613.2	18625.3	214181	275511	847314	903770

## Sheet: Average
																										7b, g m	0.001	0.01	0.1	1	5	10	20	40	80	100		7b, g m	0.001	0.01	0.1	1	5	10	20	40	80	100
		µg/L													µg/L											µg/L	1	10	100	1000	5000	10000	20000	40000	80000	100000		µg/L	1	10	100	1000	5000	10000	20000	40000	80000	100000
	Cel/mL	1	10	100	1000	5000	10000	20000	40000	80000	100000			Cel/mL	1	10	100	1000	5000	10000	20000	40000	80000	100000		LOGC	0	1	2	3	3.69897	4	4.30103	4.60206	4.90309	5		LOGC	0	1	2	3	3.69897	4	4.30103	4.60206	4.90309	5
	Calcio	203455	148654	168178	152157	146766	144314	128108	117897	105728	96086.2			Ca2+	0	26.9351	17.3388	25.2132	27.863	29.0683	37.0335	42.0524	48.0336	52.7727		Ca2+	0	26.9351	17.3388	25.2132	27.863	29.0683	37.0335	42.0524	48.0336	52.7727		Co2+	0	31.592	50.8309	73.5298	77.9312	87.0301	100	100	100	100
	Cobalto	201504	137845	99077.7	53338.5	44469.4	26134.9	0	0	0	0			Co2+	0	31.592	50.8309	73.5298	77.9312	87.0301	100	100	100	100		Co2+	0	31.592	50.8309	73.5298	77.9312	87.0301	100	100	100	100		Ni2+	0	14.0252	30.9006	42.5562	75.9858	87.8922	100	100	100	100
	Cobre	204174	189389	165546	112418	97685	84338.3	81582.3	54976.8	0	0			Cu2+	0	7.2415	18.9189	44.9402	52.156	58.6929	60.0428	73.0735	100	100		Cu2+	0	7.2415	18.9189	44.9402	52.156	58.6929	60.0428	73.0735	100	100		Mn2+	0	6.28306	10.8134	45.6368	59.8615	69.8212	77.4324	78.3597	85.5974	96.1303
	Hierro	201888	193424	143101	129295	114412	110255	100845	94700.5	20131.2	9103.89			Fe3+	0	4.19208	29.1184	35.9567	43.329	45.3881	50.0488	53.0924	90.0285	95.4906		Fe3+	0	4.19208	29.1184	35.9567	43.329	45.3881	50.0488	53.0924	90.0285	95.4906		Cu2+	0	7.2415	18.9189	44.9402	52.156	58.6929	60.0428	73.0735	100	100
	Manganeso	204526	191676	182410	111187	82093.9	61723.7	46156.7	44260	29457.2	7914.49			Mn2+	0	6.28306	10.8134	45.6368	59.8615	69.8212	77.4324	78.3597	85.5974	96.1303		Mn2+	0	6.28306	10.8134	45.6368	59.8615	69.8212	77.4324	78.3597	85.5974	96.1303		Fe3+	0	4.19208	29.1184	35.9567	43.329	45.3881	50.0488	53.0924	90.0285	95.4906
	Niquel	208499	179257	144072	119770	50069.5	25244.6	0	0	0	0			Ni2+	0	14.0252	30.9006	42.5562	75.9858	87.8922	100	100	100	100		Ni2+	0	14.0252	30.9006	42.5562	75.9858	87.8922	100	100	100	100		Ca2+	0	26.9351	17.3388	25.2132	27.863	29.0683	37.0335	42.0524	48.0336	52.7727
