# Supplementary material for: The effect of heavy metals on the viability of Tetraselmis marina AC16-MESO and an evaluation of the potential use of this microalga in bioremediation
Source: PeerJ. 2018 Jul 25;6:e5295. doi: 10.7717/peerj.5295 (PMC6064205; doi:10.7717/peerj.5295)
Supplement: Supplemental Information 1 — Effect of different concentrations of metal ions on the growth of the microalga Tetraselmis marina AC16-MESO. (A) Ca2+; (B) Co2+; (C) Cu2+; (D) Fe3+; (E) Mn2+; and (F) Ni2+. For each metal, the microalga was cultured at ion concentrations of 0.0 (control), 0.1, 1.0, 5.0, 10.0 and 20.0 mg*L−1, and cellular densities were measured at 0, 24, 48, 72 and 96 h. Asterisks indicate significant differences between metal treated and control cultures at each time of measurement, at a 95% confidence level after a Bonferroni correction for n = 3, at pλτ0.05. All assays were carried out in triplicate. [file peerj-06-5295-s003.xlsx]

## Sheet: Cu and Ca
			Regresión	1.05364e+06
Día 1
Read 1	560	nm																	Concentration mg/l						DS
	1	2	3	4	5	6	7		Concentración celular								Ca	Days	0.1	1	5	10	20	Control	0.1	1	5	10	20	Control
A	0.0757916	0.10049	0.109412	0.107434	0.119215	0.0556654	0.0575197		83076.1	109013	118383	116305	128678	61940.5				0 hrs	59209.8	52659.9	51714.5	26586.9	35996.8	40485.2	17966.9	7491.81	3504.31	7619.69	8819.22	2960.82
B	0.128538	0.112635	0.114919	0.121662	0.109148	0.0539995	0.055416		138468	121767	124166	131247	118106	60191				24 hrs	88774.4	91586.7	87908.4	73556.2	62274.5	91106.7	32756.6	8800.07	5582.07	15532.3	15415.5	8053.67
C	0.104342	0.113047	0.1089	0.117021	0.102538	0.0518501	0.0531798		113059	122200	117845	126373	111164	57933.8				48 hrs	277725	240290	213590	221907	178570	196297	22069.5	29128.4	2714.91	18820.6	40378.9	17066.8
D	0.0600579	0.058579	0.0618323	0.0900551	0.0760229	0.051779	0.0522078		66553.3	65000.2	68416.7	98054.9	83319	57859.2				72 hrs	451490	465590	404738	423577	362428	399946	41283.3	19785.7	11669.3	12514	75004.2	73378
E	0.110245	0.107445	0.112712	0.114717	0.122895	0.0583096	0.0994377		119258	116317	121849	123954	132542	64717.4	107908			96 hrs	521265	580992	495980	531427	498564	542881	16540	17800.7	20255.1	22509.7	54882.2	55123.6
F	0.116109	0.27185	0.117906	0.116955	0.108785	0.0578222	0.0957952		125416	288968	127303	126304	117724	64205.4	104083
G	0.103984	0.107758	0.113126	0.121043	0.114105	0.0581047	0.0938887		112683	116645	122283	130597	123311	64502.1	102081
H	0.0599406	0.0587002	0.061891	0.0610828	0.06963	0.057956	0.0567226		66430.1	65127.5	68478.3	67629.5	76605.5	64346					Concentration mg/l						DS
																	Cu	Days	0.1	1	5	10	20	Control	0.1	1	5	10	20	Control
Día 2																		0 hrs	52688.7	108849	55333.1	59321.9	47920	39973.2	6367.58	99585.4	3031.38	3369.01	7483.31	2960.82
Read 1	560	nm																24 hrs	94746.6	120429	71757	72958.3	58235.2	89096.4	7007.41	61846.9	1428.92	3675.82	7891.97	8053.67
	1	2	3	4	5	6	7											48 hrs	231106	193093	83167.4	81984	63244.4	196297	33953	96171.7	1849.91	3855.69	4423.58	17066.8
A	0.142023	0.144142	0.148437	0.143731	0.16874	0.0596716	0.060811		152629	154854	159365	154423	180686	66147.6				72 hrs	483740	340003	127175	115518	88739.4	399946	34702.9	61906.3	5036.58	8291.73	2898.19	73378
B	0.197469	0.160693	0.154216	0.170961	0.144657	0.0557696	0.0588638		210856	172235	165433	183018	155396	62049.9				96 hrs	557093	466834	183600	157946	136711	542881	52863.1	21277.4	14710.3	9300.65	5445.07	55123.6
C	0.144984	0.154701	0.143598	0.167356	0.142157	0.0514106	0.0547106		155739	165943	154284	179233	152770	57472.3
D	0.0769575	0.0659657	0.0650402	0.0906394	0.0925511	0.053498	0.0542714		84300.4	72757.4	71785.4	98668.6	100676	59664.4
E	0.162792	0.136868	0.131256	0.128581	0.136127	0.0576839	0.140517		174439	147215	141322	138513	146437	64060.2	151048
F	0.15764	0.243956	0.131574	0.133026	0.123135	0.0578299	0.13606		169030	259674	141656	143181	132794	64213.6	146367			Ca
G	0.149554	0.147934	0.133756	0.135487	0.123085	0.0563474	0.150999		160538	158837	143947	145765	132742	62656.6	162055		24	0.1	1	5	10	20	Control
H	0.0664402	0.0615752	0.0638653	0.0628905	0.0719949	0.0586927	0.0593325		73255.7	68146.7	70551.6	69528	79089	65119.6				16522.8	44012.8	49966	18250.5	45358.5	41354.9
																		71914.3	56766.8	55749	33191.9	34786.9	37529.7
Día 3																		46505.3	57200.3	49428.5	28318.4	27845	35527.5
Read 1	560	nm
	1	2	3	4	5	6	7										48	0.1	1	5	10	20	Control
A	0.303195	0.271806	0.29548	0.28035	0.310957	0.0607239	0.0617934		321885	288921	313782	297894	330036	67252.7				68329	82096.9	87579.2	55754.7	80010.2	66747.4
B	0.332915	0.316897	0.291823	0.31104	0.272187	0.0574265	0.0604695		353096	336273	309943	330123	289321	63789.9				126556	99477.9	93647.8	84349.7	54719.3	62066.8
C	0.40007	0.266366	0.203408	0.311731	0.21781	0.0541576	0.0585418		423619	283209	217093	330848	232217	60357.1				71438.4	93185.2	82498.2	80564.1	52094	77754.5
D	0.0809326	0.0562087	0.060181	0.0897312	0.096943	0.0533054	0.0553653		88474.9	62511	66682.6	97714.8	105288	59462.1
E	0.268054	0.198593	0.144075	0.137642	0.138925	0.0573005	0.233716		284981	212036	154784	148029	149376	63657.6	248921		72	0.1	1	5	10	20	Control
F	0.328031	0.355647	0.143385	0.143555	0.13093	0.0586551	0.238914		347966	376967	154059	154238	140980	65080.1	254379			233410	226410	247099	200179	224748	160446
G	0.277112	0.195508	0.146722	0.14437	0.132629	0.0573172	0.264101		294494	208797	157564	155094	142764	63675.1	280830			264621	273762	243260	232408	184033	165904
H	0.0709963	0.0660441	0.0655317	0.063787	0.0739374	0.0608166	0.0618889		78040.3	72839.7	72301.6	70469.4	81128.9	67350				335144	220698	150411	233133	126929	192355
día 4																	96	0.1	1	5	10	20	Control
																		498718	457665	489972	432705	429054	330569
	0.555833	0.492016	0.526753	0.501772	0.505506	0.0631303	0.0634572		587193	520176	556655	530420	534342	69779.8				557102	488110	473469	428713	377035	341579
	0.611428	0.521008	0.511038	0.49797	0.455972	0.0586147	0.0631502		645576	550621	540152	526428	482324	65037.7				298650	450996	250773	409312	281195	462810
	0.365319	0.485666	0.298977	0.479495	0.364708	0.0555509	0.0607155		387125	513507	317455	507027	386483	61820.2
	0.10538	0.0613181	0.0631434	0.0958367	0.107999	0.0544755	0.0572006		88474.9	62511	66682.6	97714.8	105288	59462.1			120	0.1	1	5	10	20	Control
	0.506991	0.405985	0.185412	0.164679	0.155297	0.0599331	0.395715		535901	429830	198194	176422	166569	66422.2	419044			562559	565481	621677	552534	558437	432478
	0.569185	0.438982	0.182566	0.178681	0.159548	0.0595636	0.406198		601215	464482	195206	191125	171033	66034.2	430054			585950	600427	593032	534009	486612	448213
	0.518726	0.32446	0.191922	0.178004	0.160471	0.0603393	0.52164		548226	344216	205031	190415	172003	66848.8	551285			415286	577068	273232	507738	450642	534845
	0.0852486	0.0684533	0.0675893	0.0659682	0.0770984	0.0646927	0.0648442		78040.3	72839.7	72301.6	70469.4	81128.9	67350
Día 5
	0.664214	0.600298	0.657532	0.626547	0.644849	0.0701343	0.0670432		701009	633888	693992	661453	680673	77135.1				Cu
	0.686488	0.633575	0.630255	0.608906	0.576454	0.0626015	0.0652989		724400	668834	665347	642928	608849	69224.4			0	0.1	1	5	10	20	Control
	0.523974	0.611331	0.325728	0.583889	0.542202	0.0567329	0.0639353		553737	645474	345548	616657	572879	63061.5				52827.6	51189.5	53370.3	56324	55936.4	41478
	0.128521	0.0618228	0.065545	0.100401	0.113082	0.0562025	0.0597498		138450	68406.8	72315.6	108919	122236	62504.5				58985.7	223840	58824.5	58674	41118.4	37652.9
	0.594028	0.50567	0.237733	0.20926	0.202225	0.0676004	0.540345		627304	534514	253140	223239	215850	74474	570929			46252.8	51517.8	53804.6	62967.9	46705.2	35650.7
	0.690596	0.544642	0.238428	0.223288	0.204849	0.0608779	0.555328		728714	575440	253870	237969	218606	67414.4	586663
	0.617655	0.51554	0.262336	0.225641	0.212225	0.0612899	0.637823		652116	544880	278976	240441	226352	67847.1	673295		24	0.1	1	5	10	20	Control
	0.103605	0.0774122	0.0713337	0.068994	0.0762514	0.0665891	0.0661513		112285	84778	78394.6	75937.5	83558.9	73412.1				101184	79068.6	70770.8	68984.7	67348	77792.1
																		95773.9	191528	71104.4	73652.8	53704.7	73111.6
																		87282.2	90690.3	73395.7	76237.3	53652.8	88799.3
																	48	0.1	1	5	10	20	Control
																		206941	139196	82482.3	77559.4	68247.3	170881		A concentración de 0,1
																		269925	304127	81757.8	83768.6	59850.7	176339
																		216453	135957	85262.1	84624.2	61635.1	202790		diferenncia significativa favorables en densidad celular	Tiempo	Promedio
																									Cobre	72	483740
																	72	0.1	1	5	10	20	Control			96	557093
																		457861	356990	125893	105952	85440	341004		Control	72	388754
																		523175	391642	122904	120656	89904.6	352013			96	498011
																		470185	271377	132729	119945	90873.7	473245
																									Calculo	diferencia entre el tratamiento y el control	porcentaje en relación al control
																	96	0.1	1	5	10	20	Control		72	94986.2	24.4335
																		515019	449736	174745	147301	132291	458644		96	59082.3	11.8637
																		616430	490663	175475	162032	135047	474378
																		539831	460102	200581	164503	142793	561011

## Sheet: Fe
1.05364e+06
Día 1
	Read 1	560	nm																																							DS
		0.1	1	5	10	20	Control	0.1	1	5	10	20	Control		0.1	1	5	10	20	Control	0.1	1	5	10	20	Control			0.1	1	5	10	20	Control	0.1	1	5	10	20	Control		0.1	1	5	10	20	Control	0.1	1
	A	0.0513108	0.0697658	0.0763339	0.0733015	0.078117	0.0677812	0.0758696	0.0682766	0.0750049	0.0705205	0.0807009	0.0628363		57367.5	76748	83645.6	80461.1	85518.1	74663.9	83158	75184.2	82249.9	77540.6	88231.6	69471		0 hrs	17669.3	23160.8	18137.7	18124.3	17432.5	16119.1	26947.6	20621.7	17482.7	18881.7	15323.3	15846.7		14927.9	4537.88	5048.14	3094.77	2642.89	3986.73	1334.13	3371.66
	B	0.0698824	0.0730282	0.0668448	0.0676141	0.0741642	0.0667492	0.074225	0.0698076	0.0686052	0.0763024	0.0762393	0.0685262		76870.5	80174.1	73680.6	74488.4	81367.1	73580.2	81430.9	76792	75529.2	83612.5	83546.2	75446.3		24 hrs	44899.2	44046.6	39982.8	36075.7	39354.4	34946.5	57410.7	46876.6	44481	48372.3	36646.8	41803.1		4946.92	10242.9	10968.5	8430.65	4456.04	3027.28	1436.36	8971.94
	C	0.0792386	0.0783277	0.0702508	0.0717971	0.0788392	0.0607508	0.0767246	0.0744427	0.0716137	0.0749786	0.0790198	0.0700485		86696	85739.4	77257.4	78881.2	86276.5	67280.9	84055.9	81659.6	78688.7	82222.3	86466.2	77044.9		48 hrs	161032	148545	118044	106554	142957	109341	159722	122562	119277	146457	145945	133750		14365.2	5438.59	14798.1	19874.5	4776.47	14152.7	9834.19	25532.7
	D	0.0503517	0.0500791	0.0531738	0.0542064	0.0602818	0.0488847	0.0502693	0.0520688	0.0543392	0.0561354	0.0661725	0.0530513		56360.3	56074	59323.9	60408.3	66788.5	54819.7	56273.8	58163.5	60547.7	62434	72974.5	59195.2		72 hrs	343192	310980	236291	223770	278391	253790	311905	274680	254014	292454	289390	308232		41671	16310.8	15288.7	47959.6	10689.2	34458.3	27152.9	16725.1
	E	0.0497619	0.0527702	0.0524042	0.0543367	0.0605957	0.0504129	0.0492629	0.0510461	0.0551282	0.0569203	0.0643625	0.0511044		55740.9	58900.1	58515.7	60545.2	67118	56424.6	55216.9	57089.5	61376.3	63258.3	71073.8	57150.7		96 hrs	514795	507215	391775	372360	415608	382552	415640	375094	400218	457000	443902	468500		17100.9	23431.8	18353.3	64211.6	17171.1	42618.6	54975.8	19223.9
	F	0.0498418	0.0521083	0.0560371	0.0523932	0.0604431	0.0499356	0.0503051	0.0505014	0.0558131	0.054806	0.0616505	0.0519855		55824.8	58205	62330.8	58504.2	66957.8	55923.3	56311.3	56517.5	62095.6	61038	68225.7	58076
Día 2
	Read 1	560	nm																									hrs	0
		0.1	1	5	10	20	Control	0.1	1	5	10	20	Control		0.1	1	5	10	20	Control	0.1	1	5	10	20	Control		mg/l	0.1	1	5	10	20	Control
	A	0.0996348	0.0958667	0.109727	0.102059	0.103482	0.0916832	0.110488	0.101715	0.106507	0.106249	0.109999	0.0955248		108115	104158	118714	110661	112155	99764.7	119513	110300	115332	115061	118999	103799			1007.21	20674	24321.6	20052.8	18729.7	19844.2
	B	0.0980819	0.0969142	0.0888418	0.0864156	0.100648	0.0914466	0.11303	0.0936454	0.102071	0.114828	0.104918	0.100945		106484	105258	96780.8	94233	109179	99516.2	122182	101825	110673	124071	113663	109491			21129.6	21274	15164.9	13943.3	14249	17155.6
	C	0.106906	0.11326	0.0989406	0.097368	0.108993	0.0865761	0.110884	0.110724	0.10592	0.113182	0.113972	0.107921		115751	122424	107386	105735	117942	94401.5	119928	119760	114716	122342	123171	116817			30871.2	27534.3	14926.5	20377	19318.7	11357.6
	D	0.0584204	0.0548465	0.059164	0.0614429	0.0677538	0.0549475	0.055728	0.0567771	0.0615944	0.0642892	0.0797684	0.0641952		64833.6	61080.5	65614.6	68007.7	74635.1	61186.6	62006.2	63108	68166.8	70996.8	87252.4	70898.1		hrs	24
	E	0.0594754	0.0661662	0.0592551	0.0601154	0.0660462	0.0578183	0.0565037	0.0583166	0.0612197	0.066932	0.0713506	0.0598696		65941.6	72967.9	65710.2	66613.7	72841.9	64201.4	62820.9	64724.7	67773.4	73772.2	78412.3	66355.5		mg/l	0.1	1	5	10	20	Control
	F	0.0584621	0.0591991	0.0648709	0.0612265	0.0668982	0.0571076	0.0581637	0.057077	0.0646143	0.0648517	0.0730798	0.0609065		64877.5	65651.4	71607.7	67780.5	73736.6	63455	64564.1	63422.9	71338.2	71587.5	80228.3	67444.4			43281.5	43077.5	53099.3	42653.7	37520.3	38578.1
																													40542.8	32290.1	31070.6	27619.3	36337.3	35314.8
																													50873.4	56772.3	35778.3	37954.1	44205.7	30946.5
Día 3																												hrs	48
	Read 1	560	nm																									mg/l	0.1	1	5	10	20	Control		A concentración de 0,1 mg/l				A concentración 1 mg/l
		0.1	1	5	10	20	Control	0.1	1	5	10	20	Control		0.1	1	5	10	20	Control	0.1	1	5	10	20	Control			177838	150145	136357	119635	141090	120763
	A	0.230801	0.200237	0.189456	0.174713	0.201656	0.174486	0.22009	0.169784	0.188294	0.190706	0.219357	0.190725		245860	213763	202442	186958	215253	186721	234612	181782	201220	203754	233842	203774			151119	143337	106030	84081.4	140734	113428		diferenncia significativa favorables en densidad celular	Tiempo hrs	Promedio		Tiempo hrs	Promedio
	B	0.205813	0.196673	0.161305	0.141666	0.202713	0.166468	0.201492	0.157108	0.166985	0.214144	0.207586	0.191689		219618	210020	172879	152254	216363	178301	215081	168471	178843	228367	221481	204786			154139	152153	111746	115946	147046	93832		Hierro	48	161032
	C	0.208661	0.206877	0.174224	0.174171	0.210009	0.148192	0.212707	0.204102	0.184162	0.216965	0.224295	0.186484		222609	220736	186445	186390	224025	159107	226858	217821	196882	231329	239027	199320		hrs	72								72	343192		96	310980
	D	0.0614558	0.057263	0.0596115	0.0607912	0.067304	0.0594909	0.0605037	0.0618466	0.0668488	0.0702075	0.0856267	0.0625958		68021.2	63618.2	66084.5	67323.3	74162.8	65957.8	67021.4	68431.7	73684.8	77211.9	93404.5	69218.5		mg/l	0.1	1	5	10	20	Control			96	514795		120	507215
	E	0.0619109	0.0601819	0.0603396	0.0615998	0.0687002	0.0584578	0.0569753	0.059726	0.0640465	0.0665216	0.0740343	0.0610746		68499.2	66683.4	66849.2	68172.6	75629	64872.9	63316.1	66204.7	70742	73341.2	81230.7	67620.9			381718	332262	251196	267025	291102	280962		Control	48	109341
	F	0.0618831	0.0619907	0.0678149	0.0637631	0.0699862	0.058841	0.0605289	0.0592946	0.0678017	0.0666973	0.0746532	0.0631391		68470	68583.1	74699.3	70444.4	76979.5	65275.4	67048	65751.7	74685.5	73525.7	81880.6	69789			350319	300477	221593	172440	269833	264895			72	253790		96	253790
																													297539	300202	236083	231846	274237	215513			96	382552		120	382552
Día 4																												hrs	96
	Read 1	560	nm																									mg/l	0.1	1	5	10	20	Control			0.1mg/l		1mg/l
		0.1	1	5	10	20	Control	0.1	1	5	10	20	Control		0.1	1	5	10	20	Control	0.1	1	5	10	20	Control			529421	516610	395972	442226	436252	421874		Calculo	diferencia entre el tratamiento y el control	porcentaje en relación al control	diferencia control tratamient	porcentaje
	A	0.422583	0.370842	0.294704	0.312168	0.341644	0.32501	0.364106	0.330499	0.300648	0.326957	0.371862	0.380787		447261	392924	312967	331307	362261	344793	385850	350558	319210	346839	393995	403368			521200	481856	378097	309859	412842	382424		48	51691.2	47.2752	-	-
	B	0.393595	0.34284	0.267836	0.222285	0.321745	0.306765	0.368014	0.299252	0.319873	0.3561	0.329364	0.363808		416818	363518	284752	236916	341365	325634	389954	317743	339399	377442	349366	385538			493763	523178	401255	364993	397729	343358		72	89402.1	35.2268	57190.5	22.5346
	C	0.344109	0.345194	0.290987	0.281289	0.327973	0.261295	0.321404	0.320229	0.294069	0.341541	0.352905	0.310453		364850	365990	309065	298880	347905	277883	341006	339772	312301	362154	374087	329506										96	132243	34.5686	124663	32.5872
	D	0.0590955	0.0544479	0.0555042	0.0578959	0.064444	0.057466	0.0538353	0.0547591	0.0636137	0.0621493	0.0854077	0.0588233		65542.6	60661.9	61771.1	64282.8	71159.4	63831.4	60018.6	60988.7	70287.4	68749.6	93174.4	65256.8
	E	0.0600069	0.0567126	0.0568251	0.05808	0.064799	0.054521	0.0521986	0.0544645	0.0579269	0.0630596	0.070088	0.0570755		66499.7	63040.2	63158.3	64476.2	71532.1	60738.7	58299.8	60679.3	64315.4	69705.6	77086.4	63421.3
	F	0.0607797	0.0593298	0.0661795	0.0605153	0.0668325	0.0560746	0.0564624	0.056071	0.0674022	0.0639278	0.0719275	0.0586135		67311.3	65788.7	72981.9	67033.6	73667.6	62370.2	62777.4	62366.4	74265.9	70617.3	79018.2	65036.5
Día 5
	Read 1	560	nm
		0.1	1	5	10	20	Control	0.1	1	5	10	20	Control		0.1	1	5	10	20	Control	0.1	1	5	10	20	Control
	A	0.565334	0.547076	0.442312	0.476603	0.477535	0.46353	0.469654	0.426855	0.440797	0.524809	0.548669	0.590058		597170	577997	467978	503989	504968	490261	496692	451747	466387	554613	579670	623134
	B	0.557979	0.515196	0.416056	0.354661	0.457039	0.419682	0.488339	0.391486	0.46369	0.497923	0.473517	0.514512		589447	544517	440405	375932	483444	444214	516314	414603	490429	526379	500749	543799
	C	0.53418	0.558178	0.449166	0.407648	0.445219	0.382454	0.389779	0.41736	0.42006	0.468889	0.465883	0.418159		564454	589656	475176	431576	471031	405118	412811	441775	444611	495888	492732	442614
	D	0.0611967	0.0551385	0.0652505	0.0554964	0.0621174	0.0618036	0.0529106	0.0549383	0.0616393	0.0611059	0.078483	0.0574921		67749.2	61387.1	72006.3	61763	68716.1	68386.5	59047.6	61177	68214	67653.8	85902.4	63858.8
	E	0.0616712	0.0563518	0.0560161	0.0596001	0.0639137	0.0555224	0.0517657	0.0537536	0.0558149	0.061401	0.0692589	0.0684809		68247.5	62661.3	62308.8	66072.5	70602.5	61790.3	57845.2	59932.8	62097.5	67963.8	76215.7	75398.7
	F	0.0639982	0.059986	0.0670738	0.0600866	0.0664848	0.0554939	0.0557271	0.0554685	0.0637782	0.0635911	0.0722223	0.0583795		70691.2	66477.8	73921	66583.5	73302.6	61760.4	62005.3	61733.7	70460.2	70263.6	79327.8	64790.7
[truncated: 4 more columns]

## Sheet: Zn
Dia 1
		Muestra
		Blanco muestra
		Control
		Blanco control
	Read 1	560	nm																																													DS
		0.1	1	5	10	20	control	0.1	1	5	10	20		0.1	1	5	10	20	Control	0.1	1	5	10	20	24	0.1	1	5	10	20	Control					0.1	1	5	10	20	control	0.1	1	5	10	20		0.1	1
	A	0.0702841	0.0727104	0.0737386	0.0797728	0.088454	0.0808979	0.0657059	0.0710352	0.0737386	0.0801354	0.0904273		72484.6	79840.4	77380.3	87256.9	96373.5	88438.5	72484.6	78081.2	80920.1	87637.7	98445.8		9937.37	2357.63	11342.1	20540.9	31383.1	28525.2				0 hrs	12468.6	18937.4	13219.8	19552.4	27173.3	28076.5	22382.9	20102.3	14812.2	20897.3	25836.1		5111.11	4418.03
	B	0.0825137	0.0779026	0.0725538	0.0786598	0.0829731	0.0817336	0.0804269	0.0724259	0.0703679	0.0797488	0.0861979		72484.6	85293	79675.9	86088.1	90617.8	89316.1	87943.9	79541.5	77380.3	87231.8	94004.3		8724.19	26608.2	17860.7	20921	21797.8	27550.5				24 hrs	37326.2	44262.8	32422.4	54002.5	69145.5	81432.9	50681.6	49747.7	34832.5	62903	69754.1		24939.2	2149.82
	C	0.0741358	0.0810405	0.0787237	0.073671	0.0862695	0.081321	0.0765714	0.0786198	0.0709426	0.0757288	0.0799715		81337.3	88588.2	77983.9	80849.2	94079.5	88882.8	83895	86046.1	77983.9	83010.1	87465.6		18744.3	27846.4	10456.4	17195.3	28339	28153.8				48 hrs	156287	129655	122274	141246	186867	216191	152563	136792	112021	174966	210034		30599.2	17090.7
	D	0.0562431	0.0704654	0.0595674	0.0602129	0.0585697	0.0537351	0.0512651	0.0537125	0.0568099	0.0579119	0.0596138		62547.2	77482.7	66038.2	66716	64990.4	59913.3	57319.5	59889.7	63142.4	64299.7	66086.9											72 hrs	292236	297105	192346	300850	342317	408803	253884	293063	258193	346226	403705		44943.8	33948.3
	E	0.0573984	0.0525652	0.055546	0.058738	0.0622163	0.0554989	0.0533592	0.0559098	0.0580596	0.0594531	0.0614749		63760.4	58684.8	61815.1	65167.1	68820	61765.7	59518.6	62197.1	64454.8	65918.2	68041.3	48	0.1	1	5	10	20	Control				96 hrs	365102	423691	287027	399883	451123	496103	338066	388539	339722	476187	519680		100362	35666.2
	F	0.0562867	0.0545239	0.0609856	0.0572969	0.059284	0.0545117	0.0541382	0.0550316	0.0578652	0.0585499	0.0617014		62592.9	60741.8	67527.5	63653.9	65740.5	60728.9	60336.6	61274.9	64250.6	64969.7	68279.2		9715.71	34855.3	37970.1	61073.8	78267.1	82754
																										58963.2	47356.8	27232.6	55185	60433.8	98859.8
Día 2																										43299.6	50576.4	32064.4	45748.7	68735.6	62685
	Read 1	560	nm
		0.1	1	5	10	20	control	0.1	1	5	10	20		0.1	1	5	10	20	Control	0.1	1	5	10	20	72	0.1	1	5	10	20	Control
	A	0.0734645	0.105535	0.0849745	0.127645	0.141792	0.140388	0.0936056	0.118347	0.101177	0.142721	0.147485		80632.3	114311	109735	137530	152387	150912	101784	127766	109735	153362	158365		165505	101536	124826	138992	214259	230253
	B	0.120316	0.105468	0.0939093	0.117711	0.127052	0.159429	0.129382	0.102369	0.10499	0.129841	0.13464		129834	114241	102102	127098	136908	170908	139354	110986	113738	139837	144876		179768	142593	119662	168045	169535	247651
	C	0.103644	0.109047	0.0911137	0.110139	0.136471	0.126201	0.109291	0.110756	0.100713	0.119545	0.139392		112326	117999	109247	119146	146798	136013	118256	119794	109247	129023	149866		123588	144836	122333	116701	176808	170669
	D	0.0642128	0.0723441	0.0650207	0.0694876	0.0672629	0.0615859	0.0599459	0.0609944	0.0658476	0.069674	0.0725157		70916.6	79455.6	71765	76455.9	74119.7	68157.9	66435.7	67536.7	72633.4	76651.6	79635.9
	E	0.064169	0.0603727	0.0679773	0.0651619	0.0695047	0.0652905	0.0623128	0.0658137	0.0685752	0.0737109	0.0750666		70870.6	66883.9	74869.8	71913.2	76473.9	72048.3	68921.3	72597.8	75497.8	80891	82314.7	96	0.1	1	5	10	20	Control
	F	0.0624126	0.0608856	0.0701796	0.0665755	0.0710178	0.0665094	0.0652366	0.0625485	0.0729499	0.0690251	0.0746662		69026.1	67422.5	77182.6	73397.7	78062.8	73328.3	71991.7	69168.8	80091.9	75970.3	81894.2		237860	250851	188666	275915	397424	472890
																										316449	323690	201981	341422	296562	411162
Día 3																										322398	316775	186390	285212	332967	342358
	Read 1	560	nm
		0.1	1	5	10	20	Control	0.1	1	5	10	20		0.1	1	5	10	20	Control	0.1	1	5	10	20	120	0.1	1	5	10	20	Control
	A	0.225622	0.213397	0.15268	0.207679	0.273746	0.288796	0.214121	0.230334	0.187385	0.267167	0.288372		240421	183314	200266	221578	290959	306763	228343	245369	200266	284050	306318		248021	377780	263410	378351	484855	582404
	B	0.238309	0.197852	0.162727	0.226563	0.233938	0.305898	0.235987	0.171243	0.179256	0.244803	0.258601		253744	211259	191730	241409	249154	324723	251306	183314	191730	260564	275054		438112	453724	333444	428927	436870	494763
	C	0.255298	0.200781	0.145264	0.177892	0.242316	0.230292	0.182708	0.191714	0.165627	0.200773	0.279892		195355	214334	200266	190297	257953	245325	195355	204813	177417	214326	297412		409173	439569	264229	392370	431643	411142
	D	0.068021	0.0745564	0.068521	0.0753256	0.0697198	0.0695396	0.0644936	0.067999	0.0734019	0.0715279	0.0739457		74915.7	81778.9	75440.8	82586.7	76699.8	76510.5	71211.5	74892.7	80566.6	78598.6	81137.6
	E	0.0671261	0.0620696	0.0653095	0.0665433	0.0725004	0.0700735	0.066922	0.0696789	0.066989	0.0701	0.0753256		73976	68665.8	72068.3	73364	79619.8	77071.2	73761.6	76656.8	73832	77099.1	82586.7
	F	0.065022	0.0628616	0.0708942	0.0667648	0.0739521	0.0677737	0.0655703	0.0648369	0.0718634	0.0712856	0.0775856		71766.3	69497.6	77933.1	73596.6	81144.3	74656.1	72342.1	71572	78950.9	78344	84960
Día 4
	Read 1	560	nm
		0.1	1	5	10	20	Control	0.1	1	5	10	20
	A	0.252871	0.315552	0.250436	0.339105	0.456383	0.520685	0.252631	0.393056	0.331917	0.440043	0.445645		320551	334861	266480	359595	482755	550282	268785	416253	352047	465596	471478
	B	0.466596	0.374154	0.260861	0.393725	0.355468	0.464304	0.374485	0.312703	0.335208	0.395118	0.447263		396750	396403	277428	416955	376779	491073	396750	331869	355503	418418	473178
	C	0.377526	0.368506	0.252124	0.340861	0.393383	0.396643	0.301925	0.345276	0.288764	0.374507	0.496419		399943	390471	268253	361439	416596	420019	320551	366075	306730	396773	524799
	D	0.0754243	0.0766814	0.0707806	0.0763672	0.0779388	0.0703791	0.0683719	0.0730254	0.0734752	0.0725919	0.0780816		82690.3	84010.5	77813.8	83680.6	85331	77392.1	75284.3	80171.1	80643.5	79715.9	85480.9
	E	0.0731488	0.0659227	0.0685267	0.0686086	0.0730692	0.072778	0.0661324	0.0725989	0.0700032	0.0729478	0.0783525		80300.7	72712.2	75446.9	75532.8	80217.2	79911.4	72932.4	79723.2	76997.4	80089.6	85765.4
	F	0.0705251	0.0668596	0.074636	0.0692694	0.0763185	0.0706351	0.0692606	0.0682109	0.074823	0.0750555	0.0796168		77545.5	73696.1	81862.5	76226.7	83629.4	77661	76217.5	75115.2	82058.9	82303.1	87093.1
Día 5
	Read 1	560	nm
		0.1	1	5	10	20	Control	0.1	1	5	10	20		0.1	1	5	10	20	Control	0.1	1	5	10	20
	A	0.313673	0.431662	0.328378	0.446238	0.550891	0.631077	0.285453	0.487006	0.424179	0.603545	0.564349		332888	456794	348331	472102	582003	666211	303252	514914	448936	637298	596136
	B	0.557628	0.495515	0.383691	0.473418	0.486426	0.555836	0.492544	0.398703	0.420713	0.490966	0.558074		520730	523850	406417	500644	514305	587196	520730	422182	445296	519073	589547
	C	0.461454	0.483652	0.325121	0.440717	0.486037	0.485511	0.386747	0.423455	0.334119	0.477758	0.596121		488081	511392	344911	466304	513897	513345	409627	448176	354360	505202	629502
	D	0.0774965	0.0719242	0.0775484	0.0859563	0.0891917	0.0764873	0.0676251	0.0633687	0.068278	0.0683186	0.0760021		84866.5	79014.7	84920.9	93750.6	97148.3	83806.7	74500	70030.1	75185.7	75228.3	83297.1
	E	0.0753548	0.0634596	0.0661718	0.0649757	0.0704195	0.0847019	0.0629116	0.0683884	0.0662292	0.0701505	0.0778751		82617.4	70125.6	72973.8	71717.7	77434.5	92433.3	69550.1	75301.6	73034.1	77152	85264.1
	F	0.0718225	0.0650752	0.0735118	0.0670856	0.0750086	0.0940049	0.0684443	0.0674566	0.0740098	0.0734637	0.0800827		78907.9	71822.2	80682	73933.5	82253.9	102203	75360.3	74323	81204.9	80631.4	87582.4
Día 6
	Read 1	560	nm
		0.1	1	5	10	20	Control	0.1	1	5	10	20
	A	0.399866	0.620543	0.541045	0.575388	0.697485	0.772968	0.458752	0.677013	0.645681	0.694278	0.703637
	B	0.696452	0.72225	0.563619	0.612144	0.633093	0.679063	0.608982	0.536487	0.601881	0.646118	0.709047
	C	0.604847	0.712953	0.511462	0.598128	0.617299	0.585113	0.529156	0.521553	0.552662	0.608287	0.733399
	D	0.0795535	0.069168	0.0913344	0.0933017	0.104507	0.0828135	0.0666077	0.0626445	0.0675511	0.0677066	0.0751983
	E	0.0777325	0.0632913	0.0653865	0.0652117	0.0717581	0.0983568	0.0658269	0.0682821	0.0661355	0.0693992	0.0777052
	F	0.0757444	0.066595	0.0751924	0.0667097	0.0748657	0.127108	0.0692068	0.0675961	0.0742124	0.0743942	0.0802221
	G	0.0603937	0.0600193	0.0620794	0.0602127	0.0628214	0.0614175	0.0630167	0.0633233	0.0639126	0.0663304	0.0653941
	H	0.117449	0.111826	0.0606372	0.0623433	0.0606685	0.0622599	0.0623803	0.0623314	0.06182	0.0626419	0.0629972
[truncated: 9 more columns]

## Sheet: Co
Día 1
	Read 1	560	nm																										Número celular
		0.1	1	5	10	20	Control	0.1	1	5	10	20	Control		0.1	1	5	10	20	Control	0.1	1	5	10	20	Control			0.1	1	5	10	20	Control	0.1	1	5	10	20	Control
	A	0.0775712	0.0828963	0.103449	0.0951139	0.119499	0.085733	0.0897795	0.094133	0.117681	0.109576	0.127078	0.0821613		84944.9	90537.1	112121	103367	128976	93516	97765.5	102337	127066	118555	136935	89765.3		0 hrs	30654.4	31326.4	34593.8	28677.9	35887.1	25154.7	30075.5	29978.2	38796.8	33221.8	46018.1	18573.1
	B	0.0940524	0.0913085	0.0986287	0.0948538	0.112581	0.0830818	0.0941576	0.0922174	0.0998107	0.10113	0.12241	0.0767077		102253	99371.2	107059	103094	121711	90731.9	102363	100326	108300	109686	132033	84038.1		24 hrs	82509.4	70695.8	61661.1	80518	100952	69329.7	79900.3	77423.9	63468	100440	130581	76550.3
	C	0.0949465	0.0945052	0.108117	0.0932047	0.102544	0.0815	0.0892322	0.0886521	0.112351	0.0944359	0.123991	0.0833389		103192	102728	117022	101363	111170	89070.8	97190.8	96581.6	121469	102655	133693	91001.9		48 hrs	171334	125605	69426.5	109720	95902.6	168380	144919	109308	74053.5	148579	151013	179366
	D	0.0598291	0.0587663	0.069426	0.0674684	0.0757833	0.0567877	0.0618303	0.0627069	0.0732676	0.0705051	0.0816003	0.0632484		66313	65196.9	76391.2	74335.4	83067.4	63119.1	68414.6	69335.1	80425.4	77524.5	89176.1	69903.8		72 hrs	230925	125110	57161.6	94697.8	73590.7	322023	213962	126986	64335.9	141572	141113	372786
	E	0.0592095	0.0599473	0.0688535	0.0660859	0.0769885	0.062111	0.0613567	0.0635863	0.0712137	0.0704572	0.0805293	0.0626666		65662.4	66437.1	75790	72883.6	84333	68709.3	67917.2	70258.7	78268.6	77474.2	88051.4	69292.8		96 hrs	285060	138359	53999.5	85735.9	58944.8	607819	239974	121559	61715	135468	126152	645214
	F	0.0599602	0.0605057	0.0730906	0.0676932	0.079333	0.0595561	0.064065	0.0630699	0.0745299	0.0692744	0.0798885	0.0632347		66450.7	67023.5	80239.6	74571.5	86795	66026.3	70761.3	69716.3	81751.2	76232	87378.5	69889.4
																												DS
																													0.1	1	5	10	20	Control	0.1	1	5	10	20	Control
Día 2																												0 hrs	10274.4	6297.31	4982.19	1087.31	8953.01	2246.14	2834.97	2921	9634.6	7967.34	2493.07	3715.35
	Read 1	560	nm																									24 hrs	5465.73	7105.38	6829.5	8110.09	24148.8	18393.3	25519.4	20591.7	21681	15051.1	14752.5	19018.3
		0.1	1	5	10	20	Control	0.1	1	5	10	20	Control		0.1	1	5	10	20	Control	0.1	1	5	10	20	Control		48 hrs	2317.44	12797.6	11621.5	13154.9	35391.4	25901.5	44148.2	28809.9	31603.6	33750.3	21526.8	26157.3
	A	0.163104	0.141995	0.172873	0.175298	0.226137	0.159368	0.178981	0.158327	0.198269	0.202576	0.266191	0.176468		174767	152600	185026	187574	240962	170844	191441	169751	211696	216219	283024	188802		72 hrs	3918.51	15845.4	17557.1	13188.3	42719.6	73674	56613.6	33552.5	36996.4	37266.1	32345.9	58576.9
	B	0.157065	0.154215	0.159917	0.182599	0.195811	0.132501	0.145082	0.168176	0.157649	0.210328	0.240918	0.140736		168426	165432	171421	195241	209115	142630	155842	180093	169039	224359	256484	151278		96 hrs	7862.91	26335.5	15615.7	19593.7	46165	110801	71939.4	31319.6	44036.1	43211.1	34051.9	53090.3
	C	0.167427	0.143071	0.165397	0.167161	0.176113	0.126468	0.13187	0.130377	0.184382	0.182553	0.264184	0.153468		179308	153729	177175	179028	256484	136294	141967	140399	197112	195191	280917	164648
	D	0.0842186	0.0771135	0.101671	0.0947267	0.121449	0.0685332	0.0722747	0.0752161	0.122043	0.103818	0.135942	0.0823076		91925.7	84464.2	110254	102961	131023	75453.6	79382.8	82471.7	131647	112508	146244	89918.9
	E	0.0826211	0.0783153	0.1035	0.0956718	0.121937	0.0749181	0.0726137	0.0775647	0.117144	0.102068	0.132623	0.0849558		90248.1	85726.3	112174	103953	131536	82158.7	79738.8	84938.1	126502	110670	142758	92699.9
	F	0.0850497	0.0818931	0.116867	0.104643	0.131088	0.0768303	0.0827911	0.0829199	0.119802	0.102641	0.129693	0.0847259		92798.5	89483.6	126212	113374	141146	84166.8	90426.6	90561.9	129293	111272	139681	92458.5
Día 3
		0.1	1	5	10	20	Control	0.1	1	5	10	20	Control		0.1	1	5	10	20	Control	0.1	1	5	10	20	Control
	A	0.260887	0.210647	0.211075	0.233615	0.271145	0.26023	0.262114	0.199305	0.240057	0.266664	0.309928	0.287337		277454	224695	225144	248815	288227	276764	278743	212784	255580	283521	328956	305231
	B	0.264928	0.218589	0.189152	0.236723	0.227356	0.212061	0.219475	0.210962	0.180058	0.28238	0.270946	0.245355		281698	233035	202122	252079	242241	226179	233966	225026	192572	300025	288019	261144
	C	0.264444	0.194662	0.197478	0.21364	0.204875	0.206439	0.178037	0.158701	0.205918	0.220546	0.301432	0.243121		281190	207909	210865	227838	218634	261144	190450	170144	219729	235090	320033	258797
	D	0.101638	0.085712	0.124076	0.117046	0.134006	0.0743689	0.0784681	0.0823148	0.137372	0.111754	0.148307	0.0872012		110219	93494	133782	126400	144210	81582.1	85886.8	89926.4	147745	120842	159229	95058
	E	0.0983918	0.0874981	0.128517	0.119138	0.134949	0.0813408	0.0800171	0.0855224	0.135836	0.112544	0.146912	0.0862221		106810	95369.7	138446	128597	145201	88903.5	87513.5	93294.9	146132	121672	157763	94029.7
	F	0.100775	0.09187	0.146779	0.134353	0.160453	0.080921	0.0871471	0.0888687	0.141275	0.120843	0.155685	0.0899907		109312	99960.9	157624	144575	171984	88462.7	95001	96809	151843	130387	166976	97987.3
Día 4
	Read 1	560	nm
		0.1	1	5	10	20	Control	0.1	1	5	10	20	Control		0.1	1	5	10	20	Control	0.1	1	5	10	20	Control
	A	0.331087	0.220165	0.240233	0.265925	0.303757	0.474912	0.337616	0.229828	0.269014	0.301204	0.355983	0.514185		351175	234690	255764	282746	322474	502213	358032	244838	285989	319794	377320	543456
	B	0.336668	0.235187	0.209796	0.26312	0.247357	0.35215	0.321855	0.237118	0.200043	0.306145	0.29561	0.419941		357036	250466	223801	279800	263246	373295	341480	252494	213559	324982	313920	444486
	C	0.338168	0.20501	0.213025	0.242907	0.224776	0.354687	0.237364	0.178495	0.222054	0.24236	0.336402	0.415366		358611	218775	227192	258573	239532	375959	252752	190931	236674	257998	356757	439681
	D	0.110958	0.0943913	0.145218	0.149356	0.164507	0.0834288	0.0877729	0.0911613	0.155445	0.128226	0.175497	0.0904827		120006	102609	155984	160330	176241	91096.3	95658.3	99216.6	166725	138140	187782	98504
	E	0.111037	0.0978757	0.158052	0.156896	0.170917	0.0878301	0.0850342	0.0925164	0.157932	0.143295	0.189385	0.0930843		120089	106268	169462	168248	182973	95718.4	92782.2	100640	169336	153965	202366	101236
	F	0.124239	0.11069	0.196489	0.195176	0.230236	0.0905588	0.112798	0.0990002	0.193944	0.173754	0.219993	0.100977		133953	119725	209826	208448	245267	98583.9	121938	107449	207154	185952	234510	109524
Día 5
	Read 1	560	nm																									24	0.1	1	5	10	20	Control
		0.1	1	5	10	20	Control	0.1	1	5	10	20	Control		0.1	1	5	10	20	Control	0.1	1	5	10	20	Control			18631.9	25340.2	35729.9	29032	45908.5	30397
	A	0.402026	0.247071	0.249796	0.285037	0.317283	0.787234	0.393536	0.218703	0.289537	0.32386	0.374422	0.771386		425672	262946	265808	302815	336679	830200	416757	233155	307542	343586	396684	813557			36590.4	32934.1	31268.6	30210.7	37377.8	22022.6
	B	0.406065	0.253768	0.229834	0.273589	0.255113	0.603714	0.342236	0.240417	0.210083	0.319865	0.309604	0.698757		429914	269978	244845	290794	271391	637476	362883	255957	224102	339390	328615	737285			36741	35704.7	36782.9	26791	24375	23044.5
	C	0.391557	0.207372	0.220724	0.248555	0.232358	0.605267	0.257866	0.181448	0.226564	0.250677	0.343806	0.674152		414679	221256	235277	264504	247495	639107	274282	194031	241410	266733	364532	711446
	D	0.1186	0.0935538	0.157047	0.158743	0.179959	0.0818919	0.0810916	0.0943538	0.161681	0.138927	0.197805	0.0925836		128031	101729	168407	170188	192468	89482.3	88641.9	102569	173274	149378	211209	100710		48	0.1	1	5	10	20	Control
	E	0.120819	0.0994889	0.17181	0.175765	0.193319	0.0841307	0.0825823	0.0922767	0.170781	0.15933	0.214535	0.0997525		130362	107962	183910	188064	206498	91833.4	90207.4	100388	182830	170805	228778	108239			82841.5	68135.4	74772.5	84612.7	109939	95390.6
	F	0.145891	0.119915	0.217235	0.227748	0.263086	0.0938212	0.144424	0.106677	0.217418	0.209151	0.255109	0.108759		156691	129413	231614	242654	279764	102010	155150	115510	231806	223124	271387	117697			78177.7	79706.1	59247.2	91287.3	77578.9	60471.2
																													86509.2	64245.7	50963.5	65654.1	115338	52127.5
																												72	0.1	1	5	10	20	Control
																													167235	131201	91361.9	122415	144017	195182
																													174889	137666	63676.6	123482	97040.9	137276
																													171878	107948	53241.1	83262.8	46649.6	172681
																												96	0.1	1	5	10	20	Control
																													231169	132082	99780	122416	146233	411117
																													236947	144198	54338.8	111552	80273.3	277577
																													224658	99050.7	17365.9	50125.3	-5734.57	277375
																												120	0.1	1	5	10	20	Control
																													297640	161217	97400.8	132628	144210	740717
																													299552	162016	60934.3	102730	64893.4	545642
																													257987	91843.1	3663.56	21850.1	-32269.4	537097

## Sheet: Mn
Día 1
Read 1	560	nm																											N° cel
		0.1	1	5	10	20	Control	0.1	1	5	10	20	Control		0.1	1	5	10	20	Control	0.1	1	5	10	20	Control				0.1	1	5	10	20	Control	0.1	1	5	10	20	Control
	A	0.0677991	0.0877705	0.0901866	0.0909609	0.09789	0.0811652	0.0924005	0.0911832	0.096972	0.0929234	0.0991871	0.0881837		74682.8	95655.8	105319	99006.2	106283	88719.2	100518	99239.7	105319	101067	107645	96089.7			0 hrs	22180.4	21927.5	18241.4	24382.5	29456.8	20375.4	28162.9	21302.1	15973.1	30058.1	35120.2	23565
	B	0.0885551	0.0916263	0.0860778	0.0893529	0.0895572	0.0863896	0.0916868	0.0892273	0.0987214	0.0998103	0.100439	0.0953014		96479.7	99704.9	107156	97317.5	97532.1	94205.6	99768.5	97185.7	107156	108299	108960	103564			24 hrs	87065.8	80094.3	81743.9	94194.2	93221.5	78560.8	101853	123378	107195	119853	117756	103493
	C	0.0917074	0.0928608	0.0862805	0.0850587	0.0928974	0.0848467	0.0893423	0.0977835	0.0985884	0.0974372	0.104519	0.0969391		99790.1	101001	107016	92808	101040	92585.4	97306.4	106171	107016	105807	113244	105284			48 hrs	227080	252100	245415	206068	100133	172584	213983	363224	324156	291523	130016	226400
	D	0.0630866	0.0689638	0.0795884	0.0668703	0.0644753	0.0635841	0.0638976	0.0678381	0.0820301	0.0664844	0.0674507	0.0729297		69733.9	75905.8	87063.3	73707.4	71192.2	70256.3	70585.6	74723.7	89627.5	73302.1	74316.8	80070.7			72 hrs	451219	476239	337349	303503	103507	346210	425463	426780	398500	406571	140320	432471
	E	0.0606319	0.0701942	0.0799822	0.0643592	0.0650994	0.0650125	0.0639219	0.0730189	0.0815157	0.0693512	0.0674394	0.068629		67156	77198	87476.9	71070.3	71847.6	71756.4	70611.1	80164.3	89087.2	76312.7	74305	75554.3			96 hrs	570219	664527	393439	368427	126537	530917	570921	521955	443499	464044	165290	635036
	F	0.0609798	0.0704588	0.0826006	0.064489	0.0666199	0.0655979	0.0651562	0.0764827	0.0851052	0.0684677	0.0689266	0.0715468		67521.4	77475.8	90226.6	71206.6	73444.4	72371.1	71907.3	83801.9	92856.8	75384.8	75866.8	78618.4
																													DS
Día 2																														0.1	1	5	10	20	Control	0.1	1	5	10	20	Control
	Read 1	560	nm																										0 hrs	13640.9	2788.39	1022.72	3204.3	4403.95	2818.76	1680.17	4708.09	1022.72	3673.92	2928.07	4888.21
		0.1	1	5	10	20	Control	0.1	1	5	10	20	Control		0.1	1	5	10	20	Control	0.1	1	5	10	20	Control			24 hrs	5834.31	2909.59	19375.5	10804.9	9265	4851.36	17249.7	49260.8	8784.52	11572.4	4457.6	8335.61
	A	0.176533	0.175518	0.173813	0.189163	0.183292	0.163666	0.195738	0.262411	0.207733	0.20245	0.200375	0.186568		188870	187804	221635	202134	195968	175357	209038	279055	221635	216087	213907	199409			48 hrs	20467.6	20587.6	12302.4	28419.4	12755.4	25917	37059.5	167891	15242.2	38350.5	14100.9	21409.3
	B	0.165813	0.169986	0.171687	0.169196	0.167173	0.156314	0.163154	0.172438	0.20798	0.198151	0.207359	0.202414		177612	181994	183781	181165	179041	167637	174820	184570	221895	211572	221242	216049			72 hrs	35374.1	50703.4	13324.4	43926.8	12380.5	42458.3	51342.1	52155	8967.76	50257.7	30019.2	50341.5
	C	0.173702	0.17248	0.182874	0.17487	0.181449	0.155143	0.175819	0.194406	0.222344	0.21902	0.208046	0.195324		185897	184614	195529	187123	194032	166408	188120	207639	236978	233488	221964	208603			96 hrs	33883.2	36467.3	23823	54722.4	14368.5	42985.1	78206.7	90712.2	14037.3	55348	48495.8	54796.8
	D	0.0880797	0.0942099	0.100651	0.0844819	0.084298	0.0805985	0.0799819	0.0870151	0.105694	0.0863192	0.0883631	0.0920766		95980.5	102418	109182	92202.2	92009.1	88124	87476.5	94862.5	114478	94131.6	96278.1	100178
	E	0.0872042	0.0957139	0.105309	0.083428	0.0855522	0.0831419	0.0781991	0.0915065	0.105832	0.0904254	0.0921081	0.0941567		95061	103997	114074	91095.5	93326.3	90795	85604.4	99579.2	114623	98443.8	100211	102362
	F	0.0920404	0.0992528	0.122815	0.0962319	0.0957558	0.086956	0.0855622	0.0982762	0.120304	0.100487	0.0989118	0.102422		100140	107714	132458	104541	104042	94800.5	93336.7	106688	129821	109011	107356	111042
Día 3
	Read 1	560	nm
		0.1	1	5	10	20	Control	0.1	1	5	10	20	Control		0.1	1	5	10	20	Control	0.1	1	5	10	20	Control
	A	0.339827	0.367502	0.343775	0.323398	0.207096	0.288232	0.326135	0.629028	0.412868	0.375912	0.230987	0.342166		360353	389416	364500	343101	220966	306171	345975	664059	437058	398248	246055	362810
	B	0.301098	0.33124	0.349863	0.27327	0.193941	0.247036	0.257209	0.325432	0.436196	0.347977	0.257431	0.323479		319682	351336	370893	290459	207151	262909	273592	345237	461556	368912	273826	343186
	C	0.316636	0.336456	0.366413	0.280658	0.218205	0.24409	0.304821	0.39034	0.439493	0.420388	0.240159	0.301438		336000	356814	388273	298218	232632	259815	323592	413400	465018	444955	255687	320039
	D	0.101421	0.100029	0.114385	0.0954566	0.107171	0.0909439	0.0871437	0.0973027	0.116369	0.0955454	0.113303	0.104328		109991	108529	123605	103727	116029	98988.3	94997.5	105666	125689	103821	122468	113044
	E	0.0988677	0.1031	0.116086	0.0934642	0.111093	0.0926398	0.0865197	0.102033	0.117267	0.10171	0.120052	0.107922		107310	111754	125392	101635	120148	100769	94342.2	110634	126632	110295	129556	116818
	F	0.108567	0.111889	0.128498	0.0997271	0.114926	0.102748	0.103212	0.107832	0.128896	0.11422	0.123803	0.108071		117496	120984	138426	108212	124173	111385	111872	116723	138844	123431	133495	116974
Día 4
	Read 1	560	nm
		0.1	1	5	10	20	Control	0.1	1	5	10	20	Control		0.1	1	5	10	20	Control	0.1	1	5	10	20	Control
	A	0.570551	0.622275	0.46234	0.442313	0.232098	0.475496	0.54685	0.482081	0.506117	0.512503	0.257212	0.581882		602649	656967	489012	467979	247222	502826	577760	509742	534983	541690	273595	614549
	B	0.50768	0.551718	0.444902	0.36564	0.225819	0.402261	0.449176	0.494979	0.517386	0.444893	0.312727	0.520606		536625	582871	470698	387461	240628	425919	475187	523287	546818	470689	331895	550200
	C	0.560079	0.529902	0.437656	0.374995	0.248641	0.40919	0.501958	0.573822	0.500637	0.537372	0.27314	0.487386		591652	559962	463089	397285	264594	433195	530616	606085	529229	567806	290322	515313
	D	0.110639	0.109366	0.1175	0.104613	0.131827	0.0930857	0.0909298	0.10208	0.123074	0.102578	0.14108	0.114855		119671	118335	126876	113343	141922	101238	98973.5	110683	132730	111206	151639	124099
	E	0.111291	0.110904	0.122174	0.103574	0.139932	0.101502	0.0947963	0.111343	0.124452	0.115343	0.153542	0.124063		120356	119950	131785	112252	150433	110076	103034	120410	134177	124611	164726	133769
	F	0.127371	0.12314	0.141512	0.107736	0.139107	0.103332	0.0968278	0.118266	0.138208	0.115387	0.147601	0.115506		137243	132799	152093	116622	149567	111998	105167	127681	148623	124657	158487	124782
Día 5
	Read 1	560	nm
		0.1	1	5	10	20	Control	0.1	1	5	10	20	Control		0.1	1	5	10	20	Control	0.1	1	5	10	20	Control
	A	0.707343	0.790017	0.527138	0.526889	0.270855	0.646532	0.709507	0.514436	0.559139	0.584441	0.297021	0.794821		746302	833122	557059	556797	287922	682441	748574	543720	590665	617236	315401	838167
	B	0.654782	0.735436	0.506298	0.429974	0.261559	0.565573	0.560812	0.620388	0.565342	0.501156	0.382176	0.715561		691105	775804	535174	455022	278161	597421	592422	654985	597180	529774	404826	754932		0	0.1	1	5	10	20	Control
	C	0.713483	0.725534	0.481816	0.44524	0.288496	0.616563	0.642615	0.685586	0.539721	0.598754	0.308627	0.696399		752750	765405	509464	471053	306449	650969	678328	723454	570272	632267	327589	734809			29323.7	19750	18255.4	25298.8	35090.6	18462.9
	D	0.174442	0.109827	0.116918	0.116179	0.152151	0.100228	0.0946976	0.106551	0.128634	0.110277	0.165599	0.128538		186674	118819	126265	125489	163265	108738	102930	115378	138568	119291	177388	138468			29323.7	22506.9	19679	26247.2	25684.5	22449.2		A concentración de 0,1 mg/l				A concentración 1 mg/l			5mg/l
	E	0.121166	0.111778	0.123147	0.122333	0.155809	0.109998	0.0898778	0.107816	0.126855	0.130975	0.181747	0.143675		130726	120867	132806	131952	167106	118998	97868.8	116707	136701	141027	194345	154364			32268.7	23525.6	16789.6	21601.4	27595.4	20214.2
	F	0.151041	0.13101	0.15124	0.111095	0.151468	0.101759	0.0973924	0.114962	0.141756	0.117454	0.168291	0.120443		162100	141063	162309	120150	162548	110345	105760	124211	152349	126828	180214	129966										diferenncia significativa favorables en densidad celular	Time hrs	Average		Time hrs	Average		Time	Average
																												24	0.1	1	5	10	20	Control		Mn	48	-		72	252100		72	245415
																													92889.8	85385.9	112453	109931	103959	87233.3			72	#DIV/0!		96	476239		96	-
																													82550.8	77996.7	69707	90069.7	85714.4	76841.7			96	-		120	664527		120	-
																													85756.9	76900.2	63071.7	82581.6	89990.9	71607.3		Control	48	-		72	172584		72	172584
																																					72	346210		96	346210		96	-
																														1	5	10	20	Control			96	-		120	530917		120	-
																														280887	240895	239374	104937	207183
																														239581	245501	188824	87002.8	162139
																														235830	249847	190006	108459	148430
																														1	5	10	20	Control				diferencia entre el contro y el tratamiento	porcentaje en relación al control
																														538632	362136	354637	105300	401589		0.1mg/l	48	-	-
																														462921	338914	275209	90195	315843			72	#DIV/0!	#DIV/0!
																														427163	310996	280663	115027	321197			96	-	-
																																				1mg/l	48	79515.5	46.0735
																														1	5	10	20	Control			72	130029	37.5579
																														714303	430794	431308	124658	573703			96	133611	25.1661
																														654937	402368	323070	111054	478423		5mg/l	48	72830.4	42.1999
																														624341	347156	350904	143900	540624			72	-	-
																																					96	-	-

## Sheet: Ni
Día 1
Read 1	560	nm
		0.1	1	5	10	20	Control	0.1	1	5	10	20	Control		0.1	1	5	10	20	Control	0.1	1	5	10	20	Control			0.1	1	5	10	20	Control	0.1	1	5	10	20	Control
	A	0.0634222	0.0881945	0.0903019	0.0838464	0.0812578	0.0824517	0.0907243	0.0912933	0.0905463	0.0844866	0.0912398	0.084616		70086.3	96101.1	98314.1	91534.8	88816.4	90070.2	98757.7	99355.2	98570.8	92207.1	99299.1	92343.1		0 hrs	21577.7	26478.5	25719.9	26316.6	21639.3	25870.7	32128.9	26971.4	27042.5	29050.6	27346.9	22517.8
	B	0.0858495	0.0794023	0.0806178	0.0804908	0.0807018	0.0877249	0.0859524	0.0868064	0.0897209	0.0921611	0.0854707	0.0846134		93638.5	86867.9	88144.3	88011	88232.6	95607.9	93746.5	94643.3	97703.9	100267	93240.6	92340.3		24 hrs	67066.4	54119.7	52932	56490.3	37218.4	61304.9	73255.8	65603.8	77304.9	75216.3	57364.4	77863.3
	C	0.082646	0.0791023	0.0859986	0.079575	0.0780445	0.0833978	0.0897288	0.0859504	0.0900448	0.0875184	0.0870925	0.0862412		90274.2	86552.9	93794.9	87049.3	85441.9	91063.8	97712.3	93744.3	98044.2	95391	94943.7	94049.8		48 hrs	132857	76944	58156.7	60261.5	42063	137312	108804	83280.3	92630.6	85341.5	57916.6	188290
	D	0.0559009	0.0565529	0.0641208	0.0565128	0.0593289	0.0606474	0.0584437	0.0603309	0.0678473	0.0596534	0.0618003	0.0643108		62187.7	62872.5	70819.9	62830.4	65787.7	67172.3	64858.1	66840	74733.3	66128.5	68383	71019.5		72 hrs	205331	99481.4	52418.9	65043.6	33955.6	321832	150579	106482	82496.6	78815.4	50974	363568
	E	0.0573305	0.057059	0.0572275	0.0565708	0.062124	0.0591714	0.0565461	0.0650673	0.0605	0.0595876	0.0606163	0.063555		63689.1	63404	63580.9	62891.2	68723	65622.3	62865.4	71814	67017.6	66059.4	67139.7	70225.8		96 hrs	245408	93439.4	36595.1	53875	30113.6	564055	222205	131873	81761.1	79434.5	53769.2	565604
	F	0.0570449	0.0574454	0.0620953	0.0556493	0.0567335	0.0598501	0.0596323	0.061602	0.0647118	0.0619356	0.0632639	0.0632777		63389.1	63809.7	68692.9	61923.6	63062.1	66335.1	66106.3	68174.8	71440.6	68525.1	69920.1	69934.6
																													DS
																													0.1	1	5	10	20	Control	0.1	1	5	10	20	Control
Día 2																												0 hrs	12738.2	5424.02	5095.34	2361.57	1803.49	2952.45	2643.63	3013.63	436.745	4059.22	3124.52	986.179
	Read 1	560	nm																									24 hrs	11418.2	14780.5	15415.5	14473	12330.5	8498.03	8268.03	10223.5	6882.26	3302.81	11169.3	12864.4
		0.1	1	5	10	20	Control	0.1	1	5	10	20	Control		0.1	1	5	10	20	Control	0.1	1	5	10	20	Control		48 hrs	18481.5	12424.9	29286.1	16011.2	28036.4	9191.72	17098.6	12957.9	2308.01	6392.03	17753.7	30366.3
	A	0.156236	0.159517	0.186894	0.198407	0.180475	0.148065	0.158566	0.161688	0.167634	0.176563	0.189213	0.175344		167555	171001	179525	182366	179925	158974	170002	173280	179525	188901	202185	187622		72 hrs	16840.9	10655.7	40176.5	41813.7	34909.1	31719.7	29471.7	14267.4	5169.14	13549.7	23900.1	66564
	B	0.169399	0.132847	0.140645	0.147823	0.147614	0.136359	0.14857	0.142221	0.173903	0.172659	0.168015	0.164972		181378	142993	151183	158720	158501	146682	159504	152837	186108	184802	179925	176730		96 hrs	29023.4	12228	44379.5	48344.1	40829.5	71916	53864.9	16766.4	12634.2	23802.3	34305.5	68743
	C	0.147827	0.138385	0.144132	0.145313	0.147742	0.132533	0.143032	0.152279	0.180737	0.170339	0.177077	0.150936		158724	148809	154844	156084	158635	142663	153688	163400	193285	182366	189442	161989
	D	0.0929792	0.0919193	0.0969146	0.0942812	0.112463	0.0782313	0.0760482	0.0843538	0.101469	0.0958046	0.116848	0.0864223		101126	100013	105258	102493	121587	85638.1	83345.5	92067.7	110041	104093	126192	94240
	E	0.0935523	0.0912964	0.0933614	0.0951075	0.118474	0.0778958	0.077361	0.0914083	0.0959959	0.099598	0.119851	0.0875349		101728	99358.5	101527	103361	127899	85285.8	84724.1	99476.1	104294	108076	129345	95408.3
	F	0.0953389	0.0929284	0.110923	0.112709	0.126111	0.0856992	0.0874867	0.0930133	0.103971	0.109286	0.133731	0.0948615		103604	101072	119970	121845	135920	93480.6	95357.7	101162	112668	118251	143921	103102
Día 3
	Read 1	560	nm
		0.1	1	5	10	20	Control	0.1	1	5	10	20	Control		0.1	1	5	10	20	Control	0.1	1	5	10	20	Control
	A	0.249958	0.191798	0.227918	0.237694	0.215871	0.22636	0.209478	0.197756	0.215392	0.214776	0.225617	0.306261		265978	204900	229445	217038	230181	241196	223468	211157	229678	229031	240416	325104
	B	0.237619	0.168468	0.167597	0.178418	0.17128	0.209052	0.192471	0.173293	0.21517	0.205415	0.194183	0.280698		253019	180401	179485	190850	183353	223020	205607	185467	229445	219200	207405	298259
	C	0.215241	0.176706	0.166171	0.175689	0.16814	0.21998	0.176925	0.182709	0.219083	0.203355	0.199114	0.248554		229519	189052	177988	187983	180056	234496	189282	195356	233554	217038	212583	264503
	D	0.106225	0.106852	0.120622	0.117434	0.131922	0.0860097	0.0857249	0.0996212	0.130446	0.11736	0.139462	0.0955199		115036	115694	130154	126807	142021	93806.6	93507.6	108101	140472	126730	149940	103794
	E	0.104531	0.103521	0.117106	0.118833	0.142578	0.0863667	0.0871026	0.105117	0.124238	0.123641	0.145776	0.10061		113257	112196	126462	128276	153212	94181.5	94954.4	113872	133952	133325	156570	109139
	F	0.112525	0.106791	0.145073	0.149044	0.160628	0.0907533	0.0952242	0.111111	0.130341	0.138747	0.168223	0.101491		121652	115631	155832	160002	172168	98788.1	103483	120167	140361	149189	180144	110064
Día 4
	Read 1	560	nm
		0.1	1	5	10	20	Control	0.1	1	5	10	20	Control		0.1	1	5	10	20	Control	0.1	1	5	10	20	Control
	A	0.340483	0.228711	0.256275	0.264891	0.241634	0.432705	0.268569	0.232051	0.232425	0.237584	0.252221	0.521164		361043	243665	272611	281660	257235	457890	285522	247172	247566	252983	268354	550785
	B	0.336657	0.208742	0.19	0.197129	0.187279	0.372703	0.237836	0.205022	0.222611	0.217397	0.211463	0.452465		357025	222694	203013	210499	200155	394878	253248	218788	237259	231783	225552	478641
	C	0.310993	0.215595	0.190021	0.194784	0.181301	0.396637	0.212528	0.216119	0.228191	0.21357	0.214293	0.394547		330073	229891	203035	208036	193877	420013	226670	230441	243118	227764	228524	417818
	D	0.13135	0.119229	0.145118	0.134959	0.14705	0.0909278	0.0911587	0.109646	0.143048	0.129505	0.15673	0.107684		141421	128692	155879	145210	157908	98971.4	99213.9	118628	153705	139483	168074	116568
	E	0.127559	0.117395	0.144883	0.142194	0.163966	0.0951744	0.09432	0.116234	0.141693	0.141449	0.168253	0.118706		137440	126766	155632	152809	175673	103431	102534	125547	152283	152027	180174	128142										Tiempo hrs	Resumen
	F	0.142649	0.132234	0.19655	0.193839	0.202196	0.0965565	0.103293	0.123121	0.162817	0.172443	0.207375	0.103172		153286	142349	209891	207044	215820	104882	111957	132779	174466	184575	221259	111830		24	0.1	1	5	10	20	Control			0.1	1	5	10	20	Control
																													7898.6	33228.6	27494.2	28704.4	23028.7	22897.9			21577.7	26478.5	25719.9	26316.6	21639.3	25870.7
Día 5																													29949.3	23463.9	24563.4	25119.8	19509.5	29985.6			67066.4	54119.7	52932	56490.3	37218.4	61304.9
	Read 1	560	nm																										26885.1	22743.1	25102	25125.7	22379.8	24728.7			132857	76944	58156.7	60261.5	42063	137312
		0.1	1	5	10	20	Control	0.1	1	5	10	20	Control		0.1	1	5	10	20	Control	0.1	1	5	10	20	Control			21577.7	26478.5	25719.9	26316.6	21639.3	25870.7			205331	99481.4	52418.9	65043.6	33955.6	321832
	A	0.40096	0.254106	0.275681	0.287511	0.266685	0.655893	0.353487	0.261475	0.257577	0.266698	0.285199	0.706774		424553	270334	292991	305414	283543	692272	374699	278072	273979	283557	302985	745704		48	0.1	1	5	10	20	Control			245408	93439.4	36595.1	53875	30113.6	564055
	B	0.401921	0.230988	0.204151	0.209725	0.205457	0.55004	0.313305	0.229768	0.234756	0.232326	0.230556	0.647729		425562	246056	217873	223727	219245	581109	332502	244775	250013	247461	245603	683698			66428.9	70988.3	74266.3	79872.6	58337.9	73336.1
	C	0.353578	0.240113	0.200925	0.205959	0.194559	0.678235	0.251654	0.242346	0.239562	0.223916	0.226859	0.576057		374795	255639	214485	219772	207800	715734	267759	257983	255060	238630	241721	608431			79650.1	43634.4	49655.4	55359.2	30601.8	61395.9			Diferencia
	D	0.144556	0.133683	0.164895	0.151787	0.159892	0.0918648	0.0903842	0.114804	0.154595	0.140906	0.169525	0.118878		155289	143871	176649	162883	171394	99955.4	98400.5	124045	165832	151457	181510	128323			55120.2	47736.4	34874.3	34239.1	22715.7	49182.7			0.1	1	5	10	20	Control
	E	0.146317	0.133488	0.173349	0.165796	0.182769	0.0848944	0.0953686	0.12454	0.156469	0.157641	0.184885	0.0974262		157139	143666	185527	177594	195419	92635.4	103635	134269	167800	169031	197641	105796			67066.4	54119.7	52932	56490.3	37218.4	61304.9		0	4293.06	-607.797	150.855	-445.878	4231.39
	F	0.164521	0.191106	0.23797	0.231706	0.238013	0.0960597	0.0979159	0.11752	0.187261	0.19747	0.234601	0.0984799		176256	204174	253388	246810	253433	104361	106310	126897	200137	210857	249850	106902		72	0.1	1	5	10	20	Control		24	-5761.48	7185.18	8372.88	4814.6	24086.4
																													150942	89206.4	99290.9	90230.2	88159.6	147389		48	4454.5	60367.8	79155.1	77050.3	95248.8
																													139762	68204.4	53023.1	62573.4	30141.5	128839		72	116501	222351	269413	256789	287877
																													107868	73421	22156	27981	7887.91	135708		96	318646	470615	527460	510180	533941
																													132857	76944	58156.7	60261.5	42063	137312
																												96	0.1	1	5	10	20	Control
																													219622	114973	116732	136449	99327.2	358918
																													219585	95928.7	47380.5	57690	24482.3	291447
																													176787	87542	-6856.24	991.87	-21942.7	315131
																													205331	99481.4	52418.9	65043.6	33955.6	321832
																												120	0.1	1	5	10	20	Control
																													269263	126462	116342	142531	112149	592316
																													268423	102390	32346	46132.5	23825.7	488474
																													198539	51465.5	-38902.5	-27038.5	-45633.7	611374
																													245408	93439.4	36595.1	53875	30113.6	564055
